# LINKING HOST PLANTS TO DAMAGE TYPES IN THE FOSSIL RECORD OF INSECT HERBIVORY

Sandra R. Schachat<sup>1,\*</sup>, Jonathan L. Payne<sup>1</sup>, and C. Kevin Boyce<sup>1</sup>

1. Department of Geological Sciences, Stanford University, Stanford, CA, United States

\* Author for correspondence: [sschachat@schmidtsciencefellows.org](mailto:sschachat@schmidtsciencefellows.org)

## Abstract

Studies of insect herbivory on fossilized leaves tend to focus on a few, relatively simple metrics that are agnostic to the distribution of insect damage types among host plants. More complex metrics that link particular damage types to particular host plants have the potential to address additional ecological questions, but such metrics can be biased by sampling incompleteness due to the difficulty of distinguishing the true absence of a particular interaction from the failure to detect it—a challenge that has been raised in the ecological literature. We evaluate a range of methods for characterizing the relationships between damage types and host plants by performing resampling and subsampling exercises on a variety of datasets. We found that the components of beta diversity provide a more valid, reliable, and interpretable method for comparing component communities than do bipartite network metrics. We found the rarefaction of interactions to be a valid, reliable, and interpretable method for comparing compound communities. Both of these methods avoid the potential pitfalls of multiple comparisons. Lastly, we found that the host specificity of individual damage types is challenging to assess. Whereas some previously used methods are sufficiently biased by sampling incompleteness to be inappropriate for fossil herbivory data, alternatives exist that are perfectly suitable for fossil datasets with sufficient sample coverage.

## 1 INTRODUCTION

Insect herbivory on fossilized leaves (henceforth, “fossil herbivory”) has been noted incidentally for over one hundred years (Potonié, 1893). However, the systematic collection of herbivory data only came with the advent of the Damage Type system (Wilf and Labandeira, 1999), for which each type of insect damage—*e.g.*, circular holes below 1 mm in diameter, circular holes between 1–5 mm in diameter—is assigned a unique number and is classified into a broader “functional feeding group” (Labandeira et al., 2007).

Traditionally, quantitative analyses of fossil herbivory have focused on two topics: the richness of damage type diversity at a fossil assemblage or for a particular host plant (Wilf and Labandeira, 1999), and the intensity of insect damage as measured by the percentage of leaf area removed by herbivores (Beck and Labandeira, 1998). Another layer of biological and analytical complexity can be added by linking particular host plants to particular damage types. On the one hand, quantitative methods in paleontology and ecology have progressed tremendously during the past two decades, making it possible to conduct complex analyses of fossil herbivory data with a single line of code. On the other hand, such analyses require more complete datasets than are typically available in studies of fossil herbivory. Complex analyses also rely upon far more assumptions than do traditional analyses, and as analytical complexity increases, the underlying assumptions and their effects can become more difficult to identify and address.

### 1.1 RESEARCH TOPICS THAT LINK HOST PLANTS TO DAMAGE TYPES

Three interrelated research topics link host plants to damage types: host specificity, component communities, and compound communities. Host specificity differentiates among generalist and specialist feeding strategies. A component community is the entire suite of heterotrophs that relies, directly or indirectly, on a plant taxon: its herbivores and their predators, parasitoids, and parasites (Root, 1973). A suite of coexisting component communities, *i.e.*, those of the different plant species within the same forest, is called a “compound

44 community” (Reice, 1974; Whittaker and Levin, 1977; Basset, 1992; Novotny et al., 2002). All of these topics  
45 present challenges when translated to the fossil record.

46 The host specificity of each fossil insect damage type is typically measured on a scale of 1 to 3 (Labandeira  
47 et al., 2007). Generalized damage types, occurring on a range of distantly related plant hosts, have a score  
48 of 1. Intermediate damage types have a score of 2. Specialized damage types, restricted to very closely  
49 related plant hosts, have a score of 3. These scores are assigned to damage types that occur on three or more  
50 specimens in a fossil assemblage. Damage types that occur on only one or two specimens are assigned the  
51 default score of 1, for generalized damage (Wilf and Labandeira, 1999). The assignment of these scores at  
52 various fossil assemblages is difficult to replicate because the boundaries between the scores are not defined  
53 quantitatively—the “1, 2, 3” labeling system could have used letters instead, *e.g.*, “A, B, C”—but the many  
54 datasets that have become available since 1999 can be used for sensitivity analyses to evaluate the validity  
55 and reliability of this system.

56 For component communities, identification of the secondary consumers associated with the herbivores  
57 on a host plant is nearly impossible with fossils. The same is often true of the herbivores, because plants  
58 and insects are rarely preserved in meaningful quantities in the same deposits (Greenwood, 1991; Martínez-  
59 Delclòs and Martinell, 1993; Smith and Moe-Hoffman, 2007). Nonetheless, component communities in the  
60 fossil record have been widely discussed using damage types as proxies for herbivore taxa (Correia et al.,  
61 2020; Ding et al., 2014, 2015; D’Rozario et al., 2011; Feng et al., 2017; Kustatscher et al., 2018; Labandeira,  
62 1998, 2002; Labandeira and Currano, 2013; Labandeira et al., 2013, 2016, 2018; Liu et al., 2020; Schachat  
63 et al., 2014, 2015; Slater et al., 2012, 2015; Xu et al., 2018). However, here too, there is reason for caution:  
64 even the fossil floras that have been most thoroughly sampled for insect herbivory contain various damage  
65 types that occur on only one specimen (Wilf et al., 2005, 2006; Prevec et al., 2009; Wappler, 2010; Knor  
66 et al., 2012; Wappler et al., 2012; Donovan et al., 2014; Adroit et al., 2018; Labandeira et al., 2018; Xu  
67 et al., 2018; Deng et al., 2020; ?), indicating that many damage types remain unobserved due to incomplete  
68 sampling—and, as noted above, whether a sparsely sampled damage type is assumed under this method to  
69 be a rare generalist or a rare specialist depends on whether it was observed on two or three plant specimens.  
70 Because we cannot find every damage type from a fossil assemblage, and because we cannot link damage  
71 types to the insect taxa in a one-to-one manner, the term “component community” as developed in the  
72 context of modern ecology may be somewhat inapplicable. These issues then scale up to consideration of  
73 compound communities.

74 Despite these issues, the general concepts drawn from modern ecology that underlie discussions of  
75 component communities in the fossil record are nevertheless valid. Ancient plants surely had specialist and  
76 generalist herbivores that formed component communities along with their secondary consumers on each  
77 plant host species. Thus, these concepts are worthy of consideration although we must be wary of the  
78 fidelity with which those communities might be documented in the fossil record. In particular, bipartite  
79 network analysis has recently been applied to fossil herbivory datasets to address questions about host  
80 specificity and component communities (Swain et al., 2021b; Currano et al., 2021). Bipartite networks are  
81 networks that connect taxa at two trophic levels, such as plants and their herbivores or herbivores and  
82 their parasitoids. Alternatively, beta diversity (Baselga, 2010; Baselga and Orme, 2012; Baselga, 2017) and  
83 rarefaction of interactions (Dyer et al., 2010) can be used to examine herbivore specialization and  
84 component communities from the leaf damage record. Calculating the beta diversity of damage types on  
85 different host plants is a straightforward way to compare component communities. Rarefying interactions is  
86 a straightforward way to quantify the diversity of associations within a compound community. Here, these  
87 alternatives are evaluated through sensitivity analyses to determine how much sampling is required for  
88 accurate and precise results, with the aim of ascertaining whether and how quantitative methods can be  
89 used to evaluate host specificity, component communities, and compound communities in studies of fossil  
90 herbivory. Bipartite network analysis requires special consideration because of the assumptions it requires  
91 of the fossil record and because of the risks associated with the large number of metrics that are generated.

## 1.2 THEORETICAL ISSUES WITH BIPARTITE NETWORK ANALYSIS

### 1.2.1 TREATING DAMAGE TYPES AS ANALOGUES OF HERBIVORE TAXA

Methods that link particular host plants to particular damage types often treat damage types as analogues for herbivorous insect taxa. For example, the two recent studies that performed bipartite network analysis on fossil herbivory data (Swain et al., 2021b; Currano et al., 2021) used a software package (bipartite; Dormann et al., 2008) intended for modern ecological networks that requires direct substitution of damage types for herbivore taxa—constituting an explicit, specific assumption that has not been substantiated and likely never can be. Only one study has used neontological data to evaluate the correlation between damage types and herbivores (Carvalho et al., 2014). In two tropical forests, the diversities of damage types and insect herbivores were found to be correlated, reaffirming the value of the traditional paleontological metric of damage type diversity. However, no claim was made as to whether the apparent specialization of a damage type reliably indicates whether the damage type was produced by a specialist herbivore.

Simple arithmetic supports the idea that specialized herbivores are responsible for many occurrences of “generalized” damage types: with hundreds of thousands of herbivorous insect species and only a few hundred damage types, no clean correspondence between insect species and damage types is possible. For example, Damage Type 012, the most common type at both forests studied by Carvalho et al. (2014), was found on all twelve host plant species examined and was caused by 50 insect species (46 of them specialists) in one locality and 37 insect species (23 of them specialists) in the other. All that complexity is collapsed into a single generalist when fossil damage types are treated as substitutes for actual herbivores. Any methods, such as bipartite network analysis, that require treating damage types as substitutes for herbivore taxa appear not to be appropriate for fossil herbivory data.

### 1.2.2 SAMPLING INCOMPLETENESS

All sampling of the fossil record is incomplete, but methods that link particular host plants to particular damage types are far more biased by incomplete sampling than are the methods that address the diversity and intensity of insect herbivory. For a tally of the number of insect damage types on two host plant taxa, as an example, the more completely sampled host could be iteratively subsampled down to the amount of surface area or sample coverage available for the less completely sampled host plant (Figure 1a). Although the subsampling procedure might cause a failure to detect a significant difference that would become apparent with additional sampling, any significant differences observed among the subsampled damage type diversities are likely, although not guaranteed, to reflect true differences. Thus, estimating damage type diversity by subsampling two incompletely sampled host plants is a common and uncontroversial endeavor. We do not know which specific damage types evaded detection, but we do not need to know this in order to estimate the damage type diversities of these two host plants when subsampled to the same surface area or sample coverage.

When it comes to estimating host specificity or comparing component communities, however, the unknowable identities of unobserved damage types are of paramount importance. According to the criteria that have traditionally been used to assign host-specificity scores (Wilf and Labandeira, 1999), a damage type need occur on only three specimens in order to receive a host-specificity score. The data are taken at face value, and the appearance of a damage type on three leaves is deemed adequate to designate a damage type as specialized, regardless of the possibility that a fourth or fifth observation might occur on a different host and thus change the host-specificity score. The procedures used to compare component communities are incapable of distinguishing a true absence of a damage type on a host plant from the failure to detect a damage type that was present on the host. Differentiating true absences from failures to detect is known to pose tremendous difficulties in both neontological (Blasco-Moreno et al., 2019) and paleontological (Smith et al., 2021) studies.

Attempts to compare host specificity and component communities across different assemblages complicate matters even further. As an example drawn from Permian assemblages of Texas for which damage type data are available for each specimen, the amount of broadleaf area examined from Colwell Creek Pond (Schachat et al., 2014) is approximately four times that of Williamson Drive (Xu et al., 2018) and more than fifteen times that of Mitchell Creek Flats (Schachat et al., 2015) or South Ash Pasture (Maccracken and Labandeira, 2020). There is just no good way to compare host specificity and component communities across these assemblages,

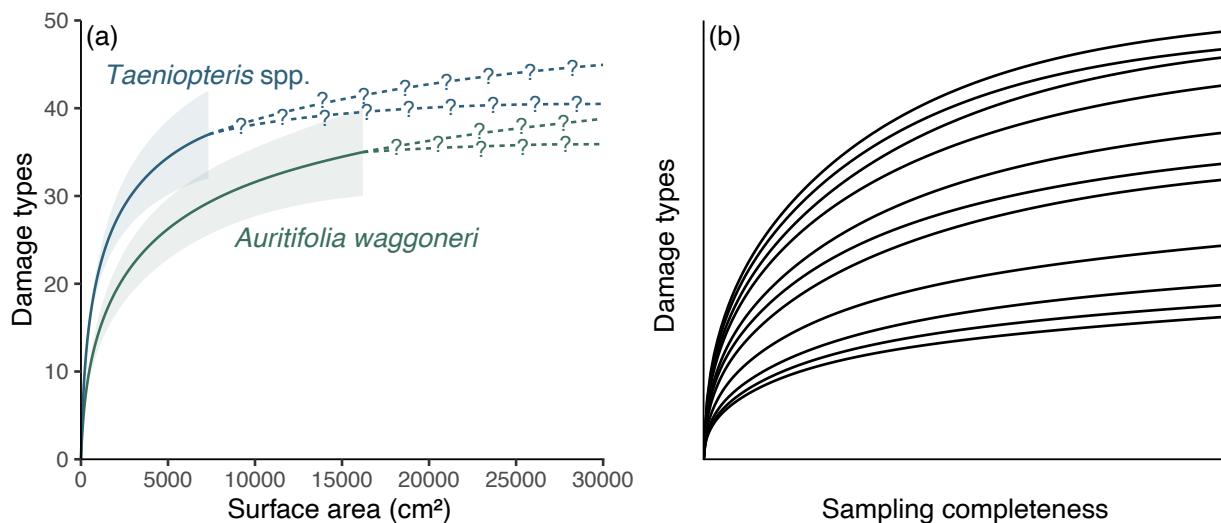

Figure 1: A comparison of the sampling completeness that can be expected for studies of fossil herbivory (a) with the sampling completeness needed for methods that link host plants to damage types to be unbiased by sampling completeness (b). (a) Rarefaction of damage types on the two dominant host plants at the Colwell Creek Pond assemblage. The solid lines and corresponding 84% confidence intervals represent interpolated damage type diversity, and the dashed lines with question marks represent extrapolated diversity. (b) An illustration of the sampling completeness that is needed for bipartite network analysis not to be biased by sampling: the rarefaction curve for each host plant should have sample coverage *sensu* Chao and Jost (2012) above 0.99. All rarefaction curves shown in this panel have coverage between 0.995 and 0.997.

143 because subsampling Williamson Drive and Colwell Creek Pond down to the amount of surface area examined  
144 at Mitchell Creek Flats and South Ash Pasture will fundamentally change the relationships among host plants  
145 and their damage types. At Colwell Creek Pond, DT014 has been observed on two *Auritifolia waggeri*  
146 Chaney, Mamay, DiMichele & Kerp specimens and on 20 *Taeniopteris* spp. Brongniart specimens. DT247  
147 has been observed on 15 *A. waggeri* specimens and 2 *Taeniopteris* spp. specimens. If the data from  
148 Colwell Creek Pond are subsampled to one-fifteenth of the original amount of surface area, the specificity  
149 coding of the damage types that are still observed at this lower level of sampling will fundamentally change:  
150 various damage types will appear more specialized than they are, and in many dimensions, the component  
151 communities of the two dominant host plants will appear more distinct than they are.

152 For rarefied damage type diversity and for the intensity of herbivory, the results generated at lower  
153 levels of sampling completeness are simply a less-precise, under-powered version of the results generated at  
154 higher levels of sampling completeness (Schachat et al., 2018). For component communities, however, the  
155 results generated with less sampling are fundamentally changed. In the words of Blüthgen et al. (2008),  
156 “Rarely observed species are inevitably regarded as ‘specialists,’ irrespective of their actual associations,  
157 leading to biased estimates of specialization.” Indeed, misleading results at incomplete sample sizes are  
158 exactly what biologists found when they subsampled some of the canonical datasets that have been used to  
159 construct bipartite networks (Morris et al., 2014, Figure 3) as part of the cottage industry that has emerged  
160 to evaluate how incomplete sampling biases bipartite network metrics (Goldwasser and Roughgarden, 1997;  
161 Vázquez and Aizen, 2003; Blüthgen et al., 2006, 2008; Dormann et al., 2009; Dorado et al., 2011; Gibson  
162 et al., 2011; Costa et al., 2016; Fründ et al., 2016; Jordano, 2016; Kuppler et al., 2017; Maia et al., 2018;  
163 Henriksen et al., 2019).

164 A related pitfall of bipartite network analysis that looms large in the neontological literature may well  
165 be insurmountable for studies of fossil herbivory: sampling evenness. Prior to the construction of bipartite  
166 networks, the sampling of fossil leaves for insect damage types should be not only complete at the level of  
167 the assemblage but should be similarly complete across all host plants within the assemblage—*i.e.*, sampling  
168 of all host plants under consideration should be even (Gibson et al., 2011; Doré et al., 2021). In studies of  
169 modern communities, sampling evenness can be achieved in various ways, *e.g.*, equal amounts of time being

170 dedicated to hand-collecting of insects and equal numbers of beating samples collected for each of ten tree  
171 species (Basset et al., 1996) and equal amounts of surface area sampled for each plant species (Novotny et al.,  
172 2012). However, uniformly exhaustive sampling is a near impossibility for studies of fossil herbivory (Figure  
173 2). Most species in a given community are rare (Diserud and Engen, 2000), and many if not most studies of  
174 fossil herbivory have examined fewer than 1,000 leaves due to a combination of small numbers of specimens  
175 preserved in the fossil record and limited time that investigators are able to invest in each study. Therefore,  
176 in studies of fossil herbivory, most plant hosts are represented by a maximum of a few hundred leaves.

177 Combining the concepts of sampling completeness and evenness, Morris et al. (2014) recommended  
178 constructing bipartite networks for datasets in which all rarefaction curves—in this case, damage type  
179 diversity curves for all host plants—approach an asymptote (Figure 1b). Various neontological food web studies have  
180 followed this recommendation (e.g., Smith-Ramírez et al., 2005; Burkle and Irwin, 2009; Mokam et al.,  
181 2014; Kemp and Ellis, 2017; Peguero et al., 2017; Bennett et al., 2018; Maia et al., 2018). However, this is  
182 not nearly as easily achieved with paleontological data as with neontological data. (Whereas one might  
183 question whether it is possible for a rarefaction curve to truly asymptote, the concept of “sample coverage”  
184 *sensu* Chao and Jost (2012) provides a measure of the slope of a rarefaction curve: when the curve has  
185 reached an asymptote, its slope equals 0 and coverage equals 1. For our purposes, sample coverage above  
186 0.99 can be considered complete. If a dataset with ten or more host plants that have coverage above 0.99  
187 eventually becomes available, it can be used to evaluate whether slightly lower amounts of coverage  
188 continue to yield reliable results. The Appendix lists examples of host plants that have been censused for  
189 fossil herbivory for which sample coverage of damage types is above 0.99.)

### 190 1.2.3 HARKING

191 A “reproducibility crisis” in science (O’Boyle et al., 2017; Hutson, 2018; Nelson et al., 2021; Fraser et al.,  
192 2018; O’Dea et al., 2021; Parker et al., 2019; Bissonette, 2021) has reinforced the need for caution  
193 surrounding practices such as multiple comparisons and hypothesizing after the results are known  
194 (HARKing). In historical sciences such as paleontology, HARKing is more difficult to avoid.  
195 Understanding the properties of a large data compilation is needed to understand which analyses are  
196 feasible, but a preliminary understanding of these properties can easily lead researchers toward the  
197 questions for which a positive result is most likely.

198 Paleobiology cannot entirely rid itself of HARKing, but good analytical practices can identify methods  
199 that yield valid and reliable results at realistic sample sizes and that do not lend themselves to unnecessary  
200 multiple comparisons. In this context, bipartite networks present additional challenges not related to  
201 sampling. When the popular R package `bipartite` is used with its default settings to study  
202 plant–herbivore interactions, the `networklevel` function calculates 47 bipartite network metrics and the  
203 `grouplevel` function calculates 30 metrics: 15 for each host plant taxon and 15 for each herbivore taxon  
204 (Dormann et al., 2008)—77 metrics despite few studies addressing 77 distinct questions. Such a multitude  
205 of metrics raises the risk of spurious correlations whereby a small minority of metrics support preconceived  
206 notions by chance.

207 For bipartite network studies, calculating a single bipartite network metric per study has been  
208 recommended to avoid “metric hacking”, *i.e.*, the “nonmutually exclusive use of multiple network metrics  
209 that are correlated by variables held in common [*e.g.*, number of host plant taxa, or sampling completeness]  
210 and the inflation of type I error rates as a result of indiscriminate selection of network metrics, comparisons  
211 or hypotheses after analyses have been conducted” (Webber et al., 2020). However, Webber et al. (2020)  
212 also note that appropriate metric is often unclear for any given ecological question. This warning echoes  
213 concerns raised over a decade earlier: “Network analyses of mutualistic or antagonistic interactions between  
214 species are very popular, but their biological interpretations are often unclear and incautious” (Blüthgen,  
215 2010). The unclear meanings of bipartite network metrics raise the specter of the “file drawer” problem, in  
216 which results that are inconclusive, negative, or do not fit with the authors’ agenda are not reported  
217 (Fraser et al., 2018). The complexity of bipartite networks makes their analysis subject to these risks in a  
218 way that traditional metrics of herbivore damage diversity and intensity are not.



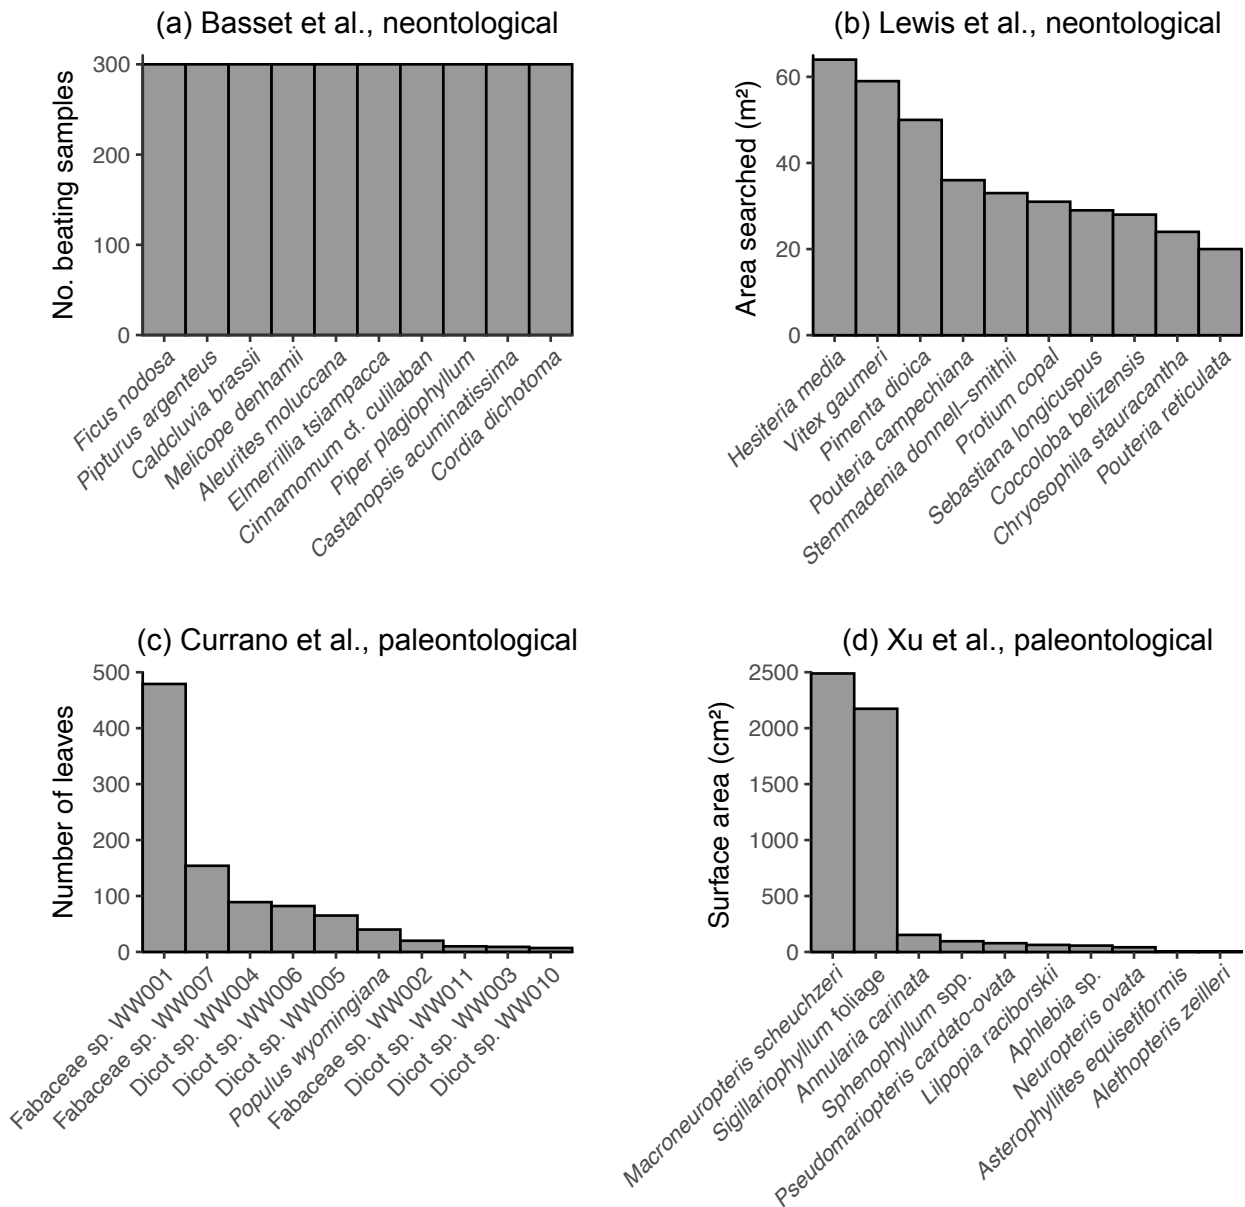

Figure 2: The sampling evenness for host plants in neontological (a–b) and paleontological (c–d) datasets that can be used to link host plants to herbivores or damage types. (a) Basset et al. (1996); this maximally even sampling is representative of various other neontological studies of plant–insect networks (Novotny et al., 2002, 2004, 2012; Lundgren and Olesen, 2005; Olesen et al., 2008; Pinheiro et al., 2008; Gibson et al., 2011; Grass et al., 2013; Trøjelsgaard et al., 2015; Oleques et al., 2019; Zemenick et al., 2021). (b) Lewis et al. (2002). (c) Currano et al. (2008). (d) Xu et al. (2018).

## 2 METHODS

219

220 Bipartite networks and several alternative methods were evaluated using existing data with a focus on the  
221 Willershausen assemblage (Adroit et al., 2018) as the angiosperm-dominated assemblage with a complete,  
222 publicly available dataset that has the highest number of leaves examined. Of the assemblages previously  
223 examined in the context of bipartite networks (Currano et al., 2021), Willershausen is emphasized as a  
224 conservative test because it is among the few assemblages most likely to have sufficient sampling completeness  
225 to quantify host specificity, component communities, and compound communities.

226 All analyses were performed with R version 4.1.1 (R Development Core Team, 2021). Color schemes were  
227 generated with the packages `colorbrewer` (Neuwirth and Brewer, 2014) and `scico` (Pedersen and Cramer,  
228 2020).

229

### 2.1 EVALUATING BIPARTITE NETWORK ANALYSIS

230

#### 2.1.1 SENSITIVITY OF BIPARTITE NETWORK METRICS TO SAMPLING COMPLETENESS

231 The 28 network-level metrics previously named in fossil herbivory studies (Swain et al., 2021b; Currano et al.,  
232 2021; Swain et al., 2021a) that are calculated with the `networklevel` function in the `bipartite` package  
233 (Dormann et al., 2008) were calculated for the Willershausen assemblage, using subsampling and resampling  
234 procedures to evaluate their validity and reliability. Leaves that were not identified to the level of genus were  
235 removed from the dataset. Each subsampling and resampling routine was iterated 1,000 times.

236 In the first set of routines (“complete”), the cleaned Willershausen dataset was analyzed in its entirety,  
237 resampled to the number of leaves in the cleaned dataset (7,333), and subsampled to 3500, 1000, 500, and  
238 300 leaves. Following previous methods (Swain et al., 2021b), all host plant taxa represented by fewer than  
239 five specimens were removed after the data were resampled or subsampled but before any analyses were  
240 performed.

241 In order to mirror neontological datasets (Basset et al., 1996; Lewis et al., 2002) that were recently  
242 compared to fossil herbivory data (Swain et al., 2021b), a second set of routines (“top-ten”) involved only  
243 the ten host plant taxa at Willershausen with the highest numbers of leaves, ranging from the 948 leaves of  
244 *Zelkova ungeri* Kovats down to the 164 leaves of *Betula maximowicziana* Regel. This top-ten dataset of 3602  
245 leaves was resampled to the original number of leaves and subsampled to 1800, 1000, 500, and 300 leaves.

246 For the sake of comparison, we calculated damage type diversity with coverage-based rarefaction (Chao  
247 and Jost, 2012) for each resampled and subsampled dataset, using the `iNEXT` function in the R package `iNEXT`  
248 (Hsieh et al., 2016). We rarefied damage type diversity to the three sample coverage thresholds discussed by  
249 Schachat et al. (2021): 0.7, 0.8, and 0.9.

250

#### 2.1.2 BIPARTITE NETWORK METRICS AND THE POTENTIAL FOR HARKING

251 To evaluate the possibility of “multiple network metrics that are correlated by variables held in common”—the  
252 collinearity among metrics noted as a major pitfall of bipartite network analysis (Webber et al., 2020)—the  
253 same 28 network-level metrics discussed above were calculated for a series of fossil assemblages deposited  
254 shortly before, during, and after the Paleocene/Eocene Thermal Maximum and the Early Eocene Climatic  
255 Optimum in the Bighorn Basin and Wind River Basin. Network metrics were calculated after subsampling  
256 the data from each assemblage to 300 leaves, following the procedure of Currano et al. (2021). If a subsample  
257 is larger than 50% of the original dataset, the number of possible unique samples decreases, causing the  
258 confidence limits to narrow even though they ought to widen continuously for larger sample sizes. Therefore,  
259 subsampling to 300 leaves and generating accurate confidence intervals requires a sample size of at least 600  
260 leaves. The ten relevant assemblages with 600 or more leaves are Skeleton Coast and Lur’d Leaves from the  
261 Bighorn Basin (Wilf et al., 2006); Dead Platypus, Daiye Spa, Hubble Bubble, the South Fork of Elk Creek,  
262 PN, and Fifteenmile Creek from the Bighorn Basin (Currano et al., 2008, 2010); and the Wind River Interior  
263 and Wind River Edge assemblages from the Wind River Basin (Currano et al., 2019).

## 2.2 EVALUATING ALTERNATIVES TO BIPARTITE NETWORK ANALYSIS

### 2.2.1 BETA DIVERSITY

We evaluated the validity and reliability of measures of abundance gradients (analogous to nestedness: when the damage types observed on one host plant are a subset of the damage types observed on another host plant) and balanced variation in abundance (henceforth, “balanced variation”; analogous to turnover: when non-overlapping suites of damage types are observed on different host plants). These are the two components of beta diversity that explicitly account for differences in abundance (Baselga, 2017). Our first analysis of beta diversity focuses on the two host plants represented by the highest numbers of leaves at Willershausen: *Z. ungeri* and *Fagus sylvatica* L. We used each subsampled and resampled dataset generated from the complete Willershausen dataset. Our second analysis of beta diversity focuses on *A. waggoneri* and *Taeniopteris* spp., the two most abundant host plants at Colwell Creek Pond (Schachat et al., 2014). These two host plants were analyzed at five levels of sampling. They were jointly resampled to the original amount of surface area they comprise in the Colwell Creek Pond dataset (23,527.89 cm<sup>2</sup>) and were subsampled to a total of 11,750, 8,000, 4,000, and 2,000 cm<sup>2</sup>. Our third analysis of beta diversity focuses on *Macroneuropteris scheuchzeri* (Hoffmann) Cleal, Shute & Zodrow and foliage assigned to *Sigillariophyllum* Grand'Eury, the two most abundant host plants at Williamson Drive (Xu et al., 2018). These were jointly resampled to the original number of leaves they comprise in the Williamson Drive dataset (1524) and were subsampled to a total of 750, 600, 450, and 300 leaves. Although surface area measurements were taken for Williamson Drive (Xu et al., 2018), we subsampled these data by number of leaves because the surface area measurements for individual specimens are not available. Each subsampling routine was iterated 1,000 times.

Abundance gradients and balanced variation were calculated for each subsampled and resampled dataset using the `beta.pair.abund` function in the R package `betapart` (Baselga and Orme, 2012). We used the `Coverage` function in the R package `entropart` with the “Chao” estimator (Marcon and Hérault, 2015) to calculate sample coverage for each of the two plant hosts in each subsampling and resampling routine.

### 2.2.2 HOST SPECIFICITY

The sensitivity of host specificity scores to sampling completeness was evaluated with the complete and top-ten resampling and subsampling routines for the Willershausen dataset. For each set of sampling routines, we recorded the number of host plant taxa on which we observed a randomly selected damage type within the 99th, 74th, and 49th percentiles of prevalence (Table 1).

|                               | Complete        |                 |                                                 | Top-ten         |                 |                            |
|-------------------------------|-----------------|-----------------|-------------------------------------------------|-----------------|-----------------|----------------------------|
|                               | 99th percentile | 74th percentile | 49th percentile                                 | 99th percentile | 74th percentile | 49th percentile            |
| Number of leaves              | 721             | 16              | 6                                               | 381             | 22              | 4                          |
| Damage types                  | DT003           | DT033, DT145    | DT010, DT021, DT052, DT081, DT142, DT190, DT198 | DT003           | DT004, DT020    | DT008, DT052, DT061, DT168 |
| Randomly selected damage type | DT003           | DT033           | DT081                                           | DT003           | DT004           | DT168                      |

Table 1: The percentiles of leaves on which damage types were observed at the Willershausen assemblage.

We performed a separate sampling procedure to address the impact of absolute and relative surface area on estimates of host specificity. For this procedure we used the data from Colwell Creek Pond (Schachat



295 *et al.*, 2014), because this assemblage contains a large amount of surface area examined and because surface  
296 area measurements are available for each individual specimen along with damage type data. We sampled  
297 specimens belonging to *A. waggoneri*, *Taeniopteris* spp., *Evolsonia texana* Mamay, and *Supaia thinnfeldioides*  
298 White, with replacement, to a series of 51 equally spaced surface-area thresholds from 500 cm<sup>2</sup> to 25,500 cm<sup>2</sup>.  
299 The smallest of these is approximately 2% of the total surface area, and the largest of these is approximately  
300 100% of the total surface area. We resampled the data to each threshold 10,000 times, for a total of 510,000  
301 iterations. For each iteration, we noted whether DT032 and DT120—which are distributed across all four  
302 of these host plant taxa—were restricted to only one host plant, thus falsely appearing to be specialized. If  
303 so, we noted the number of specimens on which the damage type had been observed.

### 304 2.2.3 RAREFACTION OF INTERACTIONS

305 The method of Dyer *et al.* (2010), which measures the diversity of interactions at an assemblage, can be  
306 implemented with any algorithm that performs rarefaction. We discuss considerations for coverage-based  
307 rarefaction of interactions in the Appendix.

308 We performed coverage-based rarefaction of interactions on data from Williamson Drive (Xu *et al.*, 2018)  
309 and Colwell Creek Pond Schachat *et al.* (2014). We conducted coverage-based rarefaction on the original  
310 dataset and upon iteratively resampling each dataset to the original amount of surface area, and upon  
311 subsampling each dataset to 50% and 25% of the original surface area. (Surface area data were collected  
312 for each specimen at Williamson Drive but were not published with the damage type data. Therefore, the  
313 surface area assigned to each specimen was the mean value for the taxon to which it belongs.) We rarefied  
314 each vector of interaction counts to a sample coverage of 0.771, which is the maximum amount of coverage  
315 reached by all subsampled datasets.

316 To understand how rarefaction of interactions might perform on an angiosperm-dominated dataset with  
317 complete sampling, we simulated a vector of counts of interactions using the base-R function `rlnorm` with  
318 the settings `meanlog=0` and `sdlog=1.5`. This procedure generated 3,000 values, which we had to round to  
319 whole integers because these values represent simulated counts. Upon removing the values that round down  
320 to 0, we had 2,046 simulated unique interactions which had were observed a total of 9,597 times. These  
321 numbers are approximately double those seen in the Willershausen dataset, so we attributed these simulated  
322 interactions to 15,000 leaves because this is approximately double the number in the Willershausen dataset.

323 We examined the validity and reliability of rarefaction of interactions in this simulated dataset by  
324 subsampling. We subsampled the interactions to one half of the original count (4,798), attributing these to  
325 one half of the original number of leaves (7,500). We then subsampled the interactions to one quarter of  
326 the original count (2,399), attributing these to one half of the original number of leaves (3,750). We  
327 rarefied each vector of subsampled interaction counts to a sample coverage of 0.726, which is the maximum  
328 amount of coverage reached by all subsampled datasets.

329 All rarefaction of interactions was carried out with the `estimated` function in the R package `iNEXT`. All  
330 resampling and subsampling procedures were iterated 1,000 times.

## 331 3 RESULTS AND DISCUSSION

### 332 3.1 SENSITIVITY OF BIPARTITE NETWORK METRICS TO SAMPLING 333 COMPLETENESS

334 None of the 28 network-level metrics mentioned in previous studies of fossil herbivory (Swain *et al.*,  
335 2021b,a; Currano *et al.*, 2021) perform as unbiased estimators for the complete Willershausen dataset  
336 (Figure 3). (An unbiased estimator is an estimator whose average value does not change in response to  
337 sampling completeness.) Two simple criteria for robustness to sampling completeness are that the 95%  
338 confidence intervals for all subsampling routines contain the mean estimate for the resampling routine, and  
339 the 95% confidence interval for the resampling routine contains the mean estimates for all subsampling  
340 routines. Coverage-based rarefaction of damage type diversity fulfills these two criteria (Figure 4), but not  
341 a single network metric examined here does.

342 When the Willershausen data are restricted to only the ten host plants with the highest number of  
343 leaves in the dataset (Figure 5), 4/28 network metrics fulfill these criteria and thus perform comparably well

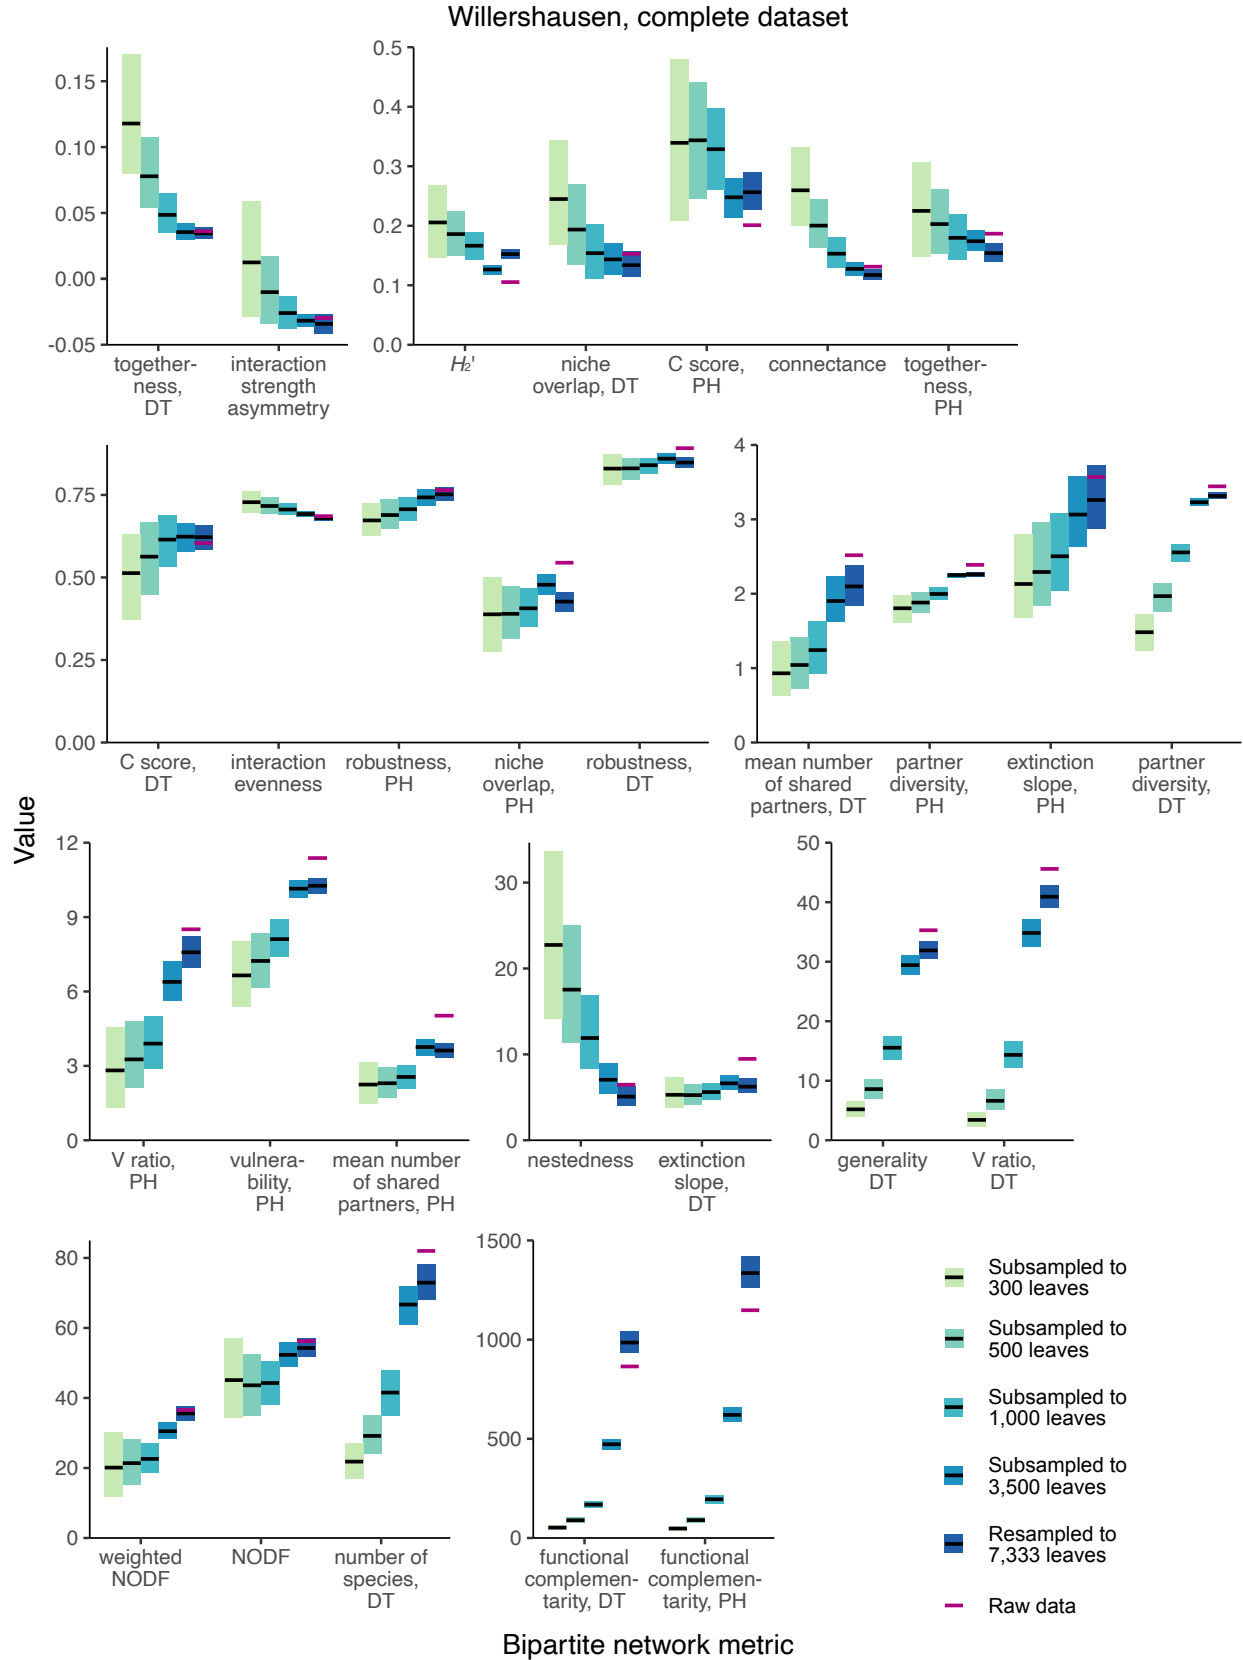

Figure 3: Mean values and 95% confidence intervals for bipartite network metrics, generated by resampling and subsampling the cleaned Willershausen dataset in its entirety. Legend: PH = plant host, DT = damage type.

344 to coverage-based rarefaction: togetherness for damage types, niche overlap for damage types, C score for  
345 damage types, and nestedness.

346 Only one network metric, C score for damage types, is among the best-performing in both the complete  
347 and top-ten analyses of the Willershausen dataset. If the C score for damage types were found to be robust  
348 for the majority of available fossil herbivory datasets, which are far less complete than Willershausen, a  
349 key question would still need to be answered: What does the C score tell us? Many metrics are generated  
350 with little understanding of what they mean in practice, simply because their calculation requires only  
351 a few lines of code. The C score has been described in the fossil herbivory literature as “the checkerboard  
352 (mutual presence/absence) nature of the interactions” (Swain et al., 2021b) and as “the randomness of species  
353 distribution across an ecosystem” (Currano et al., 2021), but no outstanding paleontological questions that  
354 can be addressed with such a metric have been identified.

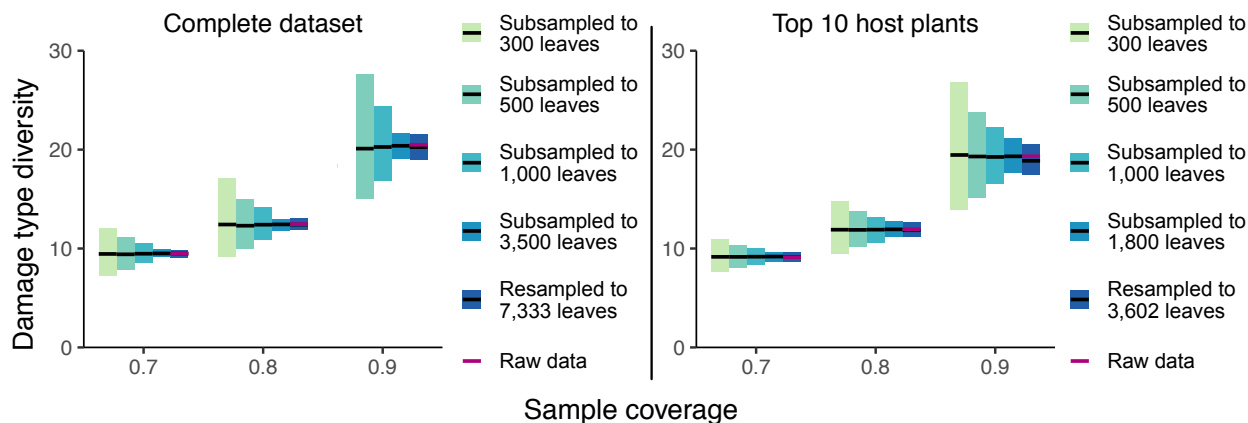

Figure 4: An example of a nearly unbiased estimator. Mean values and 95% confidence intervals for coverage-based rarefaction, generated by resampling and subsampling the Willershausen dataset. Moreover, coverage-based rarefaction performs as a consistent estimator, in that estimates converge on the true value as sample size increases. No results are presented for 300 subsampled leaves from the complete dataset at sample coverage of 0.9 because some iterations of this sampling routine yielded an observed sample coverage below 0.9.

355

### 3.1.1 APPARENT ROBUSTNESS AT LOWER SAMPLE SIZES

356 For many metrics in both the complete and top-ten datasets, the mean estimate and the limits of the  
357 confidence intervals change little for the subsampling routines at 1,000, 500, and 300 leaves. However, when  
358 the resampling routine and the subsampling routines with over 1,000 leaves are taken into account, it is clear  
359 that these metrics are biased by sampling incompleteness. The misleading, apparent lack of bias in certain  
360 network metrics seen at lower levels of sampling makes intuitive sense. When a relatively large proportion of  
361 realized interactions are unobserved because only 1,000 leaves have been sampled, the additional proportion  
362 of realized interactions that go unobserved at 500 or 300 leaves will make little difference for various metrics.  
363 These findings and this reasoning highlight the danger of evaluating the bias of network metrics by performing  
364 sensitivity analyses on smaller datasets. Therefore, any metrics that appear robust to subsampling routines  
365 performed on datasets smaller than that of Willershausen should be treated with extreme caution. For these  
366 same reasons, methods that quantify the extent to which bipartite network metrics are biased by sampling  
367 incompleteness (Swain et al., 2021a) may well be unreliable, especially when applied to incomplete datasets.

368

### 3.1.2 IMPLICATIONS FOR OTHER ASSEMBLAGES

369 At any amount of sampling that is realistic for studies of fossil herbivory, the results of bipartite network  
370 analysis are biased by sampling completeness. The finding that certain metrics are “relatively robust” (Swain  
371 et al., 2021a) is an inevitability by chance alone given presentation of dozens of metrics (Swain et al., 2021b;

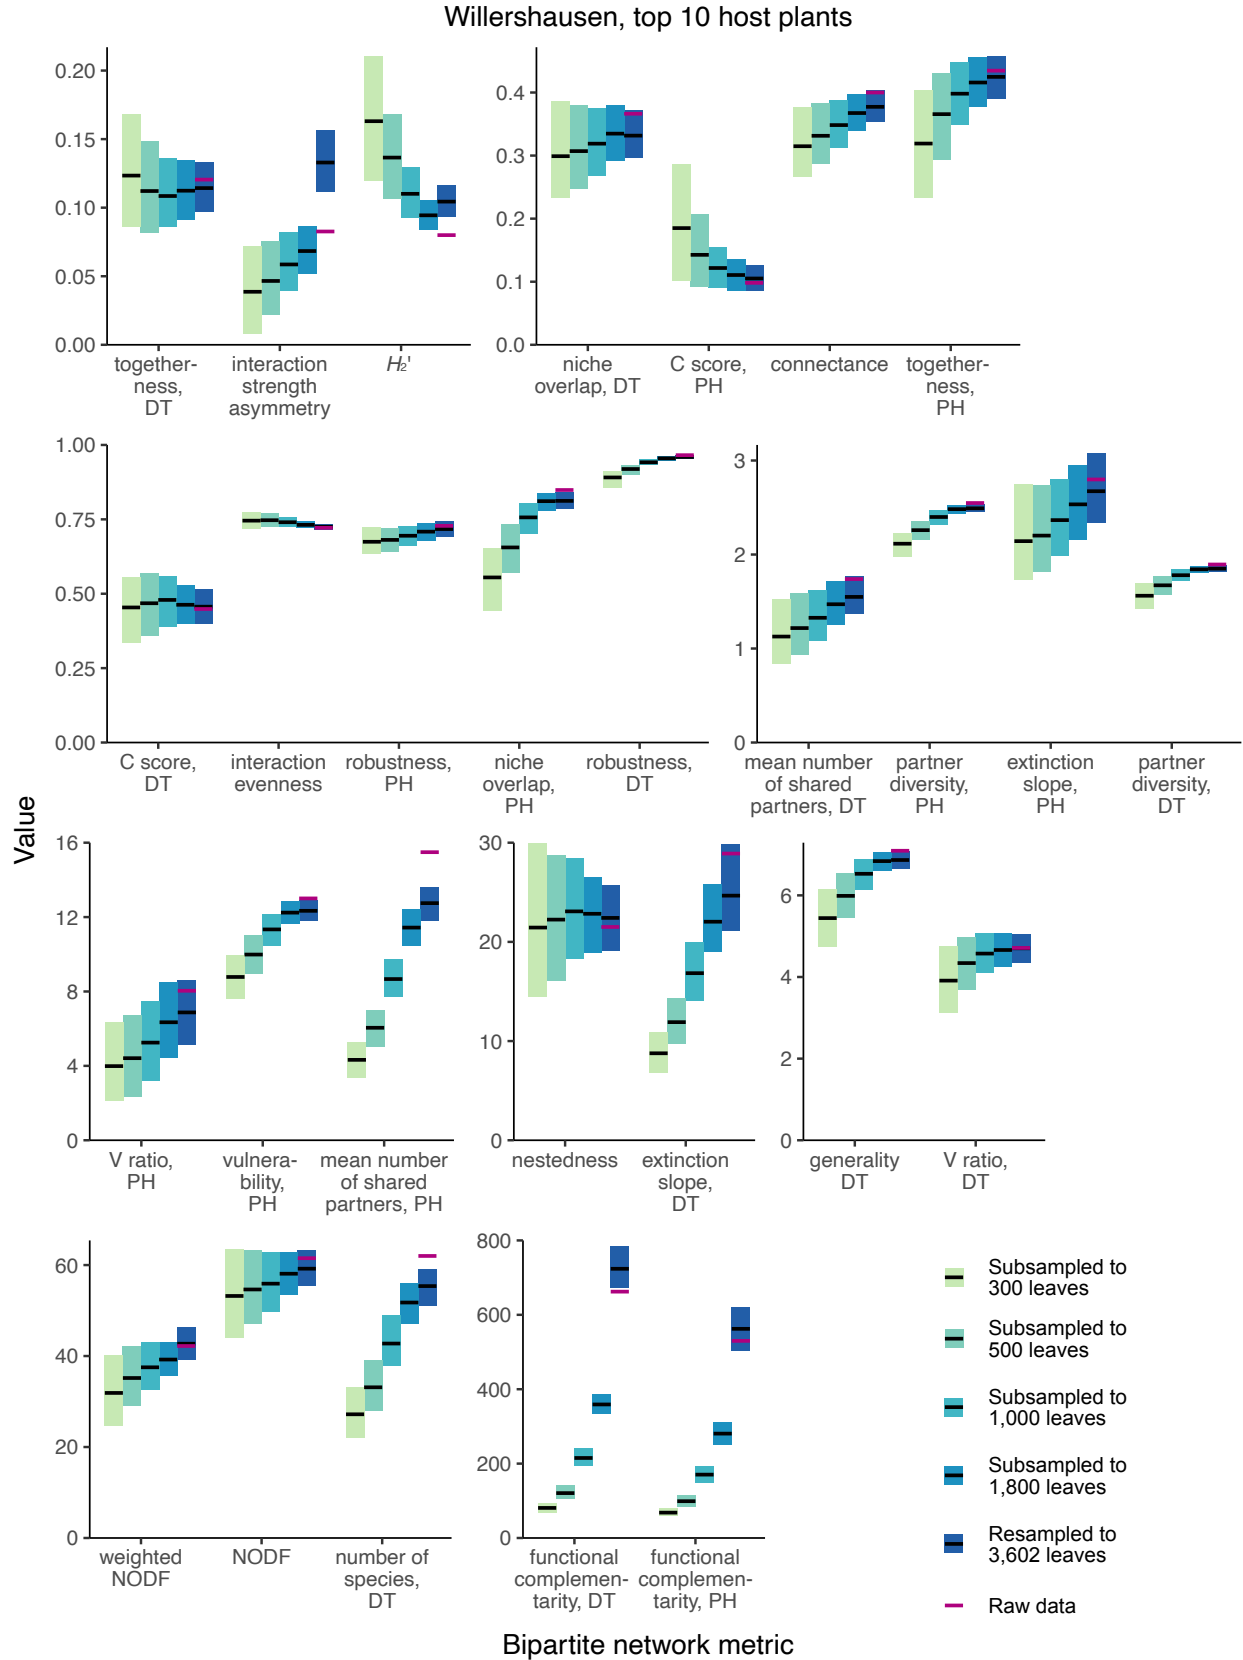

Figure 5: Mean values and 95% confidence intervals for bipartite network metrics, generated by resampling and subsampling data for the ten host plants at Willershhausen represented by the highest numbers of leaves. Legend: PH = plant host, DT = damage type.

372 Currano et al., 2021). Even when we limit our analysis to the ten most abundant host plants at Willershausen,  
373 the mean estimates at 300 and 500 leaves for the best-performing metrics (Swain et al., 2021a) either lie  
374 beyond (NODF,  $H_2'$ , connectance, and niche overlap PH) or just barely fall within (niche overlap DT)  
375 the 95% confidence interval generated with the resampled dataset. Estimates of these metrics at different  
376 sampling intensities are even more discordant for the complete Willershausen dataset.

377 Neontological evaluations of bipartite networks have indicated that sampling is complete enough for  
378 bipartite network metrics to be valid and reliable only when two criteria are met. First, the rarefaction  
379 curves should asymptote for all taxa at the lower trophic level (Arceo-Gómez et al., 2018), e.g., rarefaction  
380 curves of damage type diversity for each host plant under consideration in a study of fossil herbivory, should  
381 reach sample coverage above 0.99. At Willershausen, coverage for the top ten host plants ranges from 0.90 to  
382 0.99. However, at Castle Rock (Wilf et al., 2006), another of the few assemblages with over 2,000 angiosperm  
383 leaves examined for which damage type data are available for each specimen, coverage of the top ten host  
384 plants is much lower, with some taxa preserving no damage at all and the highest coverage only reaching  
385 0.72. At the Bilina–DSH assemblage (Knor et al., 2012), also with over 2,000 angiosperm leaves examined,  
386 coverage of the top ten host plants ranges from 0.59 to 0.90. Therefore, low sample coverage of damage  
387 types for individual host plants is clearly not due to lack of investigator effort; this is a characteristic of  
388 some of the best-sampled assemblages. Rather, low sample coverage of damage types for individual host  
389 plants is a near-inevitability given the vastly uneven frequencies of both host plants and damage types in  
390 fossil assemblages. Even the less common host plants must be represented by enough specimens for their  
391 individual damage diversity rarefaction curves to asymptote. This requirement is unrealistic for essentially  
392 the entirety of the fossil record as it is currently sampled.

## 393 3.2 ALTERNATIVES TO BIPARTITE NETWORKS

### 394 3.2.1 BETA DIVERSITY

395 Our calculations of balanced turnover and abundance gradients for the two dominant host plants at  
396 Willershausen show that these metrics are valid and reliable under the resampling routine and under the  
397 routine in which the dataset was subsampled to 3,500 leaves (Figure 6). At lower levels of sampling, the  
398 abundance gradient metric remains valid but is noticeably less reliable. The balanced variation metric  
399 becomes less valid and reliable at lower levels of sampling. Unsurprisingly, estimates of balanced turnover  
400 and abundance gradients are most valid and reliable when coverage is high.

401 Among the datasets generated by iteratively resampling the Willershausen data and by subsampling the  
402 data to 3,500 leaves, coverage estimates do not overlap but estimates of balanced turnover and abundance  
403 gradients overlap almost perfectly. However, estimates become much less reliable when the Willershausen  
404 dataset is subsampled to only 1,000 leaves, and the levels of coverage for *Z. ungeri* and *F. sylvatica* fall to  
405 0.91 and 0.86, respectively.

406 The Colwell Creek Pond data yield much more valid and reliable results. This is perhaps unsurprising,  
407 because coverage of the second-most abundant host plant is higher at Colwell Creek Pond than at  
408 Willershausen. Whereas it is very rare for two host plants within a single assemblage to have such high  
409 sample coverage—0.990 for *A. waggoneri*, and 0.989 for *Taeniopteris* spp.—our findings suggest that valid  
410 and reliable estimates of balanced turnover and abundance gradients are achievable for those rare  
411 assemblages with two host plants that are nearly completely sampled.

412 The Williamson Drive data yield results that are even more valid and reliable than those for Colwell Creek  
413 Pond. This is a bit surprising: although the most dominant host plant at Williamson Drive, *Macroneuropteris*  
414 *scheuchzeri*, has sample coverage of 0.991, the second-most dominant host plant, *Sigillariophyllum* foliage,  
415 has sample coverage of only 0.948—far less than that of *Taeniopteris* spp. at Colwell Creek Pond. For  
416 Williamson Drive, balanced variation and abundance gradients essentially perform as unbiased and consistent  
417 estimators, to nearly the same extent as does coverage-based rarefaction (Figure 4). Further analyses are  
418 needed to determine exactly why these two metrics perform somewhat better for the Paleozoic data than  
419 for Willershausen—richness of damage types may be a key determinant—and particularly why these metrics  
420 perform better for Williamson Drive than for Colwell Creek Pond.

421 Nevertheless, it is clear that these two components of beta diversity are a preferable alternative to bipartite  
422 network metrics. They are more valid and reliable than nearly any bipartite network metric that has been



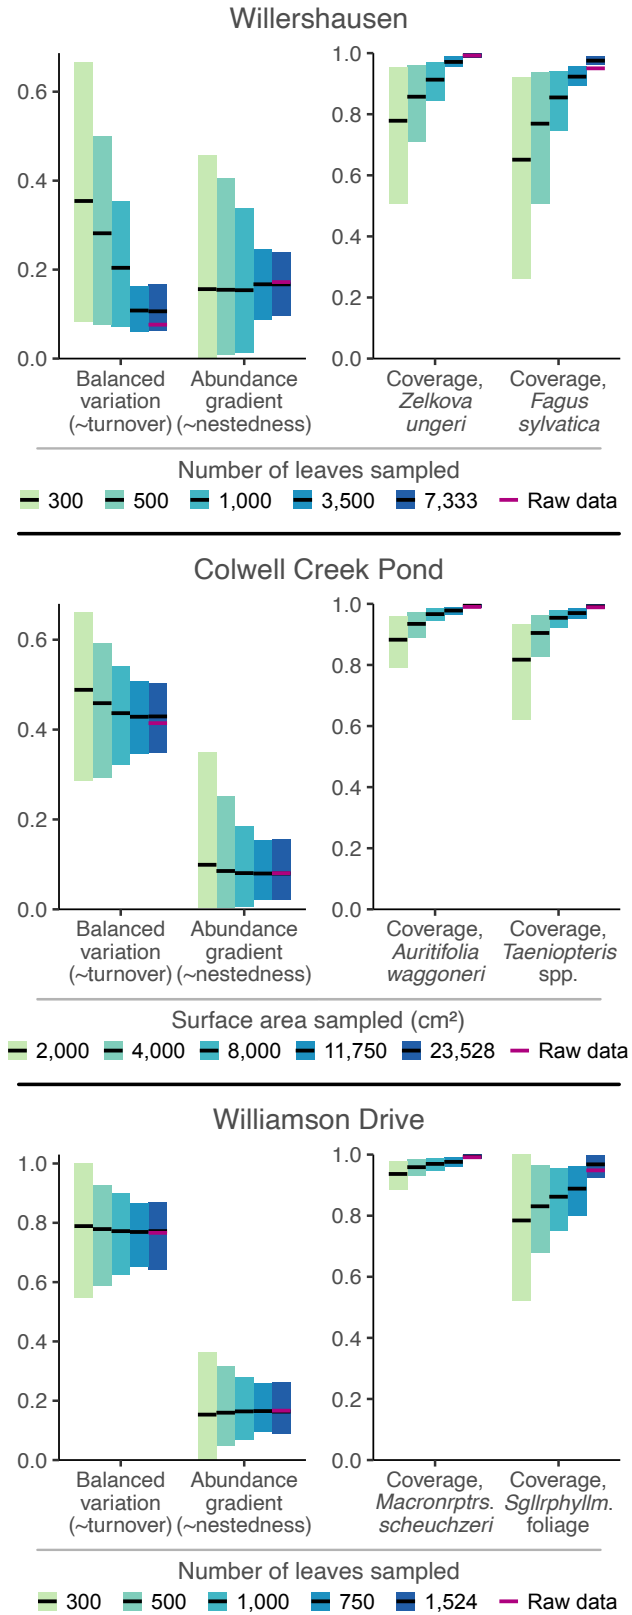

Figure 6: Mean values and 95% confidence intervals for beta diversity metrics, generated by resampling and subsampling data for the two most abundant host plants from Willershausen, Colwell Creek Pond, and Williamson Drive.

423 examined for fossil herbivory (Currano et al., 2021; Swain et al., 2021b). Their meanings are clear, as is  
 424 the difference between them. They provide no opportunity for metric hacking. They can be calculated for  
 425 pairwise comparisons among host plants, or can be used to generate a single value for an entire assemblage  
 426 (Baselga and Orme, 2012; Baselga, 2017), and can thus be used whether an assemblage contains two or  
 427 twenty host plants with nearly complete sampling.

### 428 3.2.2 HOST SPECIFICITY

429 The results of our resampling and subsampling procedures demonstrate that the traditional method for  
 430 assigning host specificity scores is strongly biased by sampling completeness: at lower levels of sampling,  
 431 the host breadth of a damage type inevitably decreases (Figure 7). For example, in the Colwell Creek Pond  
 432 resampling routines, we treated each iteration in which the generalist DT032 or DT120 damage type was  
 433 restricted to only one host plant taxon as a false positive finding of specialization. DT032 appeared on  
 434 only one host plant taxon in 2.72% of iterations; DT120, 3.78%. When a finding of specialization requires  
 435 a damage type to appear on three or more specimens, following the convention established by Wilf and  
 436 Labandeira (1999), the false positive rate falls to 0.93% for DT032 but remains at 3.34% for DT120.

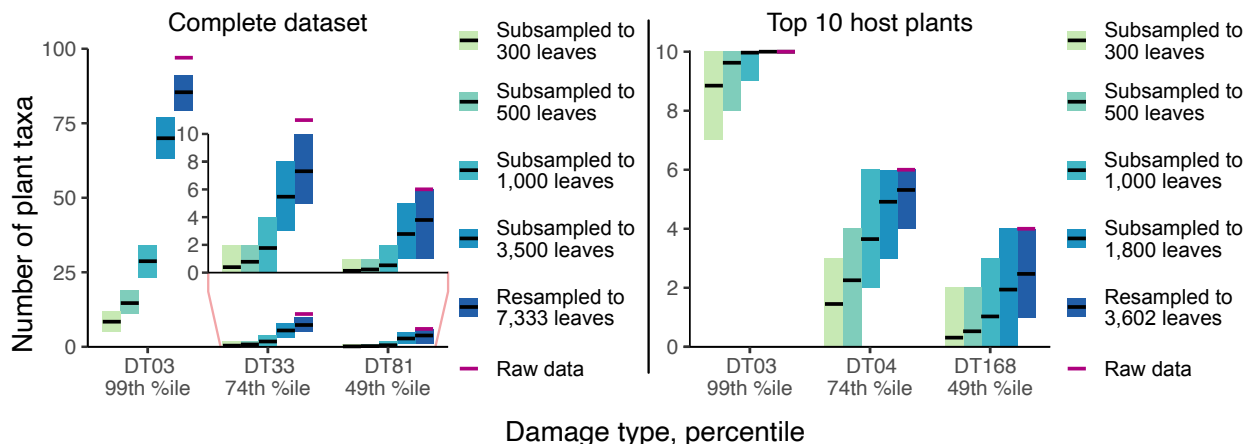

Figure 7: Mean values and 95% confidence intervals for the number of plant taxa on which various damage types appear, calculated with the Willershhausen dataset.

437 The inadequacy of the three-specimen threshold for designation of a damage type as “specialized” is shown  
 438 by the frequencies of false positive results (Figure 8). These frequencies follow lognormal distributions. For  
 439 DT032, which was observed on fewer leaves than DT120,  $\sigma > 1$  such that the greatest proportion of false  
 440 positive results occur when this damage type is observed on only one specimen. However, for DT120,  $\sigma < 1$   
 441 such that 4.7% of false positive results occur when this damage type is observed on only one specimen,  
 442 8.7% occur when this damage type is observed on four specimens, and 4.9% occur when this damage type  
 443 is observed on nine specimens. Thus, the three-specimen threshold protects against only a small fraction of  
 444 false positives.

### 445 3.2.3 RAREFACTION OF INTERACTIONS

446 Coverage-based rarefaction of interactions performs as an unbiased and consistent estimator: as sampling  
 447 completeness decreases, the mean estimate changes negligibly while confidence intervals widen (Figure 9).  
 448 Resampled estimates and confidence intervals are often invalid for rarefaction of interactions, because the  
 449 number of singletons in a resampled dataset tends not to exceed the number of singletons in the original  
 450 dataset. The number of singletons is one of the main determinants of estimated sample coverage, and  
 451 thus, resampled datasets tend to have higher estimated coverage than the original datasets. This means  
 452 that coverage-based rarefaction will generate lower estimates for resampled data than for subsampled data.  
 453 This is abundantly clear for rarefaction of interactions in the simulated dataset and is also quite notable

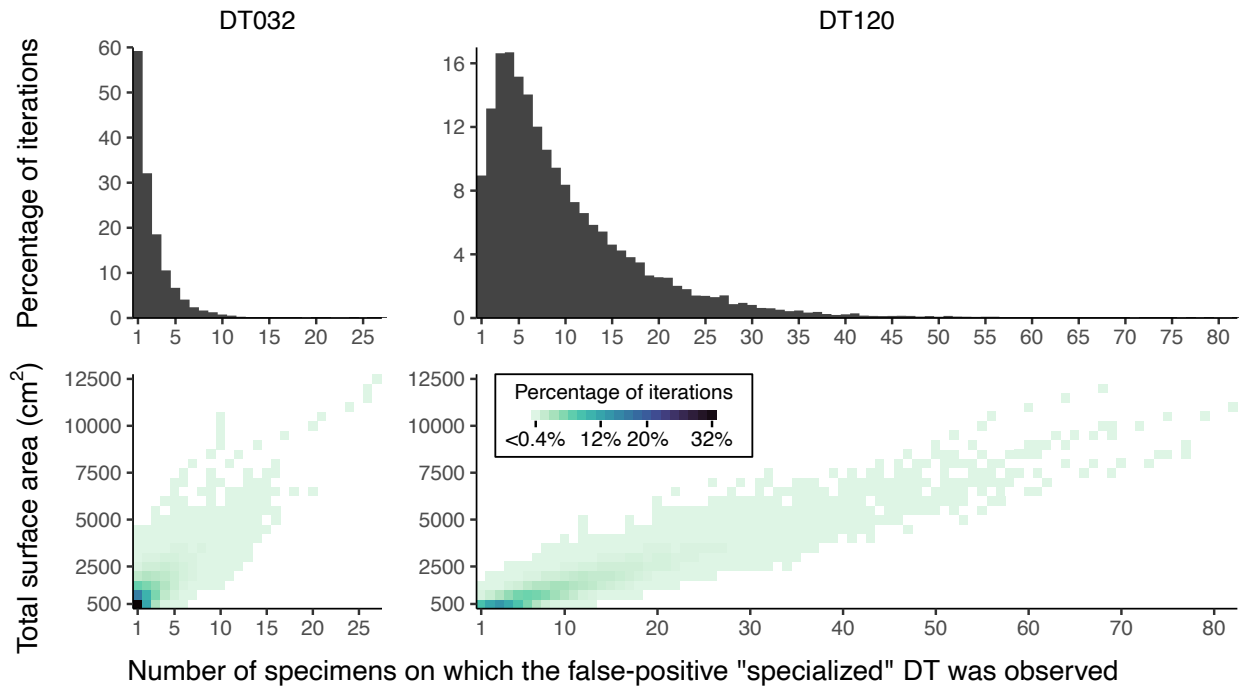

Figure 8: False positive results of "specialized" damage generated by iteratively resampling data from Colwell Creek Pond. We treated each iteration in which DT032 or DT120 was observed on only one host plant taxon as a false positive. The heatmaps show the percentage of iterations for each amount of subsampled surface area in which a false positive result was recovered, arranged by the number of specimens on which the damage type was observed. The histograms show the summed percentages, by number of specimens.

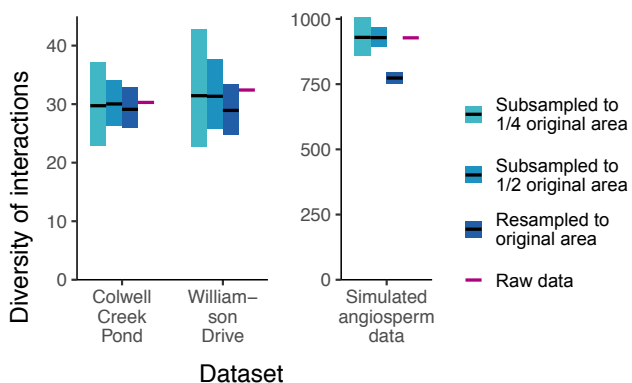

Figure 9: Mean values and 95% confidence intervals for coverage-based rarefaction of interactions. The datasets presented here are Williamson Drive and Colwell Creek Pond, both from the Permian of Texas (rarefied to a sample coverage of 0.771), and a simulated dataset that mimics the patterns seen among angiosperms at Willershausen (rarefied to a sample coverage of 0.726).

454 for Williamson Drive. The estimation of confidence limits from iteratively sampled data should therefore  
 455 be performed with subsampled, rather than resampled, data whenever the mean estimate generated with  
 456 resampled data is clearly invalid. The methodology of coverage-based rarefaction of interactions is illustrated  
 457 in Figure 10.

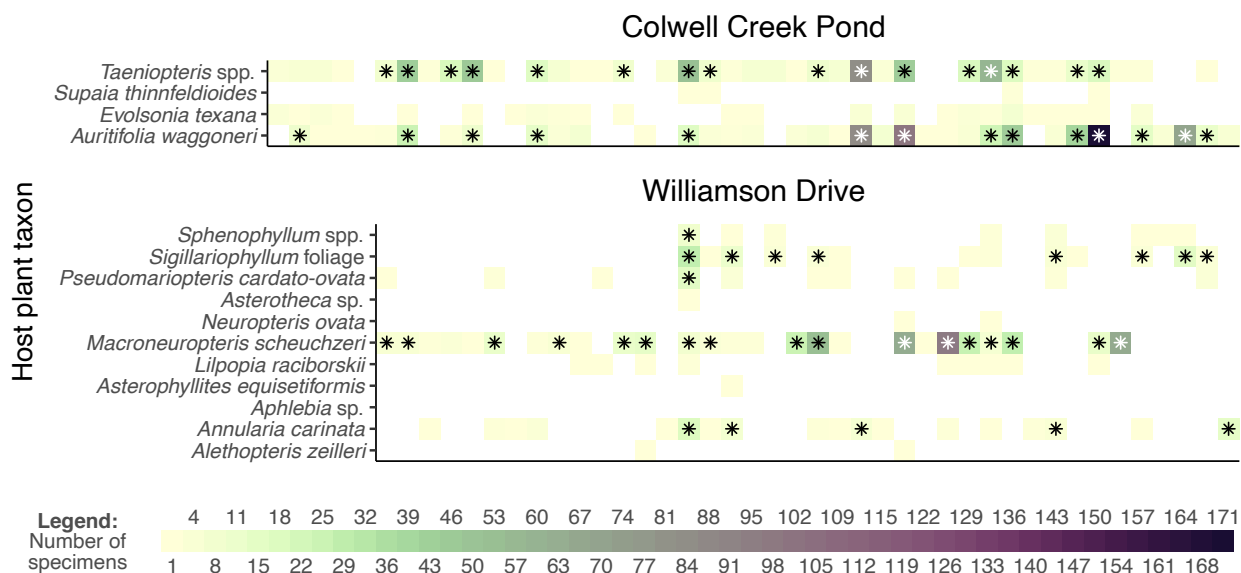

Figure 10: Comparison of the raw and rarefied interaction data from Colwell Creek Pond and Williamson Drive. Each column of each graph represents a damage type. The heatmaps show the prevalence of each interaction, and the asterisks denote interactions that remain after rarefying data from each assemblage to a sample coverage of 0.771.

### 458 3.3 AN EXAMPLE OF BIPARTITE NETWORK METRICS AND THE POTENTIAL FOR 459 METRIC HACKING

460 While it has been argued that bipartite network metrics allow a more finely resolved, “in-depth”  
 461 understanding of the relationships between host plants and damage types (Swain et al., 2021a), others  
 462 argue that the multiple comparisons presented in many network studies often contain spurious results  
 463 (Webber et al., 2020). To evaluate which of these two views of multiple comparisons in network studies is

464 applicable to fossil herbivory datasets, we calculated bipartite network metrics for one of the most iconic  
465 and intensely studied series of assemblages in this discipline: Paleocene and Eocene floras of the western  
466 interior of North America (Wilf and Labandeira, 1999; Currano et al., 2008, 2010). The finding of increased  
467 insect herbivory at the Paleocene/Eocene Thermal Maximum (PETM) is supported by quantitative  
468 measures of herbivorized leaf area (Currano et al., 2016) and by damage type diversity, whether rarefied by  
469 number of leaves (Currano et al., 2010)—an older practice shown to be biased by differences in leaf surface  
470 area among host plant taxa (Schachat et al., 2018)—or rarefied by sample coverage (Schachat et al., 2021).  
471 Changes in herbivory at the Early Eocene Climatic Optimum (EECO) have not been examined as  
472 thoroughly (Currano et al., 2019), but the logic about climate, nutrient availability, and herbivory used to  
473 describe the PETM (Currano et al., 2008, 2010) ought to apply to the EECO as well.

474 When the 28 bipartite network metrics considered here are calculated for the Paleocene–Eocene  
475 assemblages of the Bighorn Basin and Wind River basin (Figure 11), none of these metrics yield extreme  
476 values for the PETM Hubble Bubble assemblage (Currano et al., 2008) or the EECO Wind River Interior  
477 assemblage (Currano et al., 2019). If these metrics are taken at face value, rather than being dismissed due  
478 to their susceptibility to sampling bias, the metrics suggest that extreme climate change does not have a  
479 perceptible impact on plant–insect interactions. For a variety of metrics (interaction strength asymmetry,  
480 the C score for host plants, connectance, togetherness, partner diversity for damage types, generality for  
481 damage types), it not the assemblage deposited during the PETM, but the assemblage deposited just  
482 afterward, that yields the most extreme values. This assemblage, South Fork of Elk Creek, was  
483 immediately noted for having only two host plants preserved in meaningful quantities (Currano et al., 2008;  
484 Currano, 2009): a peculiarity that has not been ascribed with ecological significance (Currano et al., 2008;  
485 Currano, 2009; Currano et al., 2010). However, this long-known peculiarity appears to be driving temporal  
486 patterns in approximately one quarter of bipartite network metrics. (For all other assemblages shown in  
487 Figure 11, the mean number of host plant taxa in each subsampling iteration ranges from 4.7 to 11.9.)

488 Different combinations of these metrics support different narratives. Of the 28 bipartite network metrics,  
489 approximately one third suggest that the PETM and EECO had similar impacts on the relationship between  
490 host plants and damage types, approximately one third suggest that the PETM and EECO had similar  
491 impacts, and approximately one third yield inconclusive results (Figure 11, Table 2). The PETM itself yields  
492 a variety of possible conclusions. Over two thirds of these metrics suggest that the relationship between host  
493 plants and damage types did not drastically change from the very late Paleocene to the PETM, and less than  
494 one quarter are inconclusive (Figure 11, Table 2). The only two metrics that suggest a drastic change in  
495 the relationship between host plants and damage types at the PETM—functional complementarity for host  
496 plants, and for damage types—are the two metrics that show the greatest amount of spread overall (Figures  
497 3, 5, 11). Moving from the PETM into the Eocene, more than one quarter of these metrics suggest that  
498 the relationship between host plants and damage types did not change from the PETM to its immediate  
499 aftermath, over one third suggest that this relationship did indeed change, and over a quarter are inconclusive  
500 (Figure 11, Table 2).

501 The only metric that returns a more extreme value for the PETM than for the two assemblages that  
502 immediately predate and postdate it—*i.e.*, the mean value for the PETM lies beyond the 95% confidence  
503 intervals for any of these four other assemblages—is “number of species, DT.” We have presented this metric  
504 here as if it were a bipartite network metric, because it was previously reported as such (Swain et al., 2021b;  
505 Currano et al., 2021) and because it is calculated with the `networklevel` function in the `bipartite` package  
506 in R (Dormann et al., 2008). However, this is not truly a bipartite network property in that it does not  
507 respond to the distribution of damage types among the host plants.

508 Bipartite network properties fail to identify the PETM as an anomaly. This finding necessitates a  
509 reckoning as to whether bipartite network analysis provides additional nuance and context to traditional  
510 metrics such as the herbivory index and rarefied damage type diversity, or, alternatively, whether these  
511 metrics are too biased at realistic sample sizes to provide results that warrant interpretation. If the canonical  
512 notion of uniquely intense and diverse insect herbivory at the PETM is erroneous, that notion should of course  
513 be challenged. But, for the many reasons detailed above, the various narratives that emerge from bipartite  
514 network analysis that contradict the accepted influence of the PETM on insect herbivory are quite likely  
515 artifacts of sampling incompleteness and unevenness.



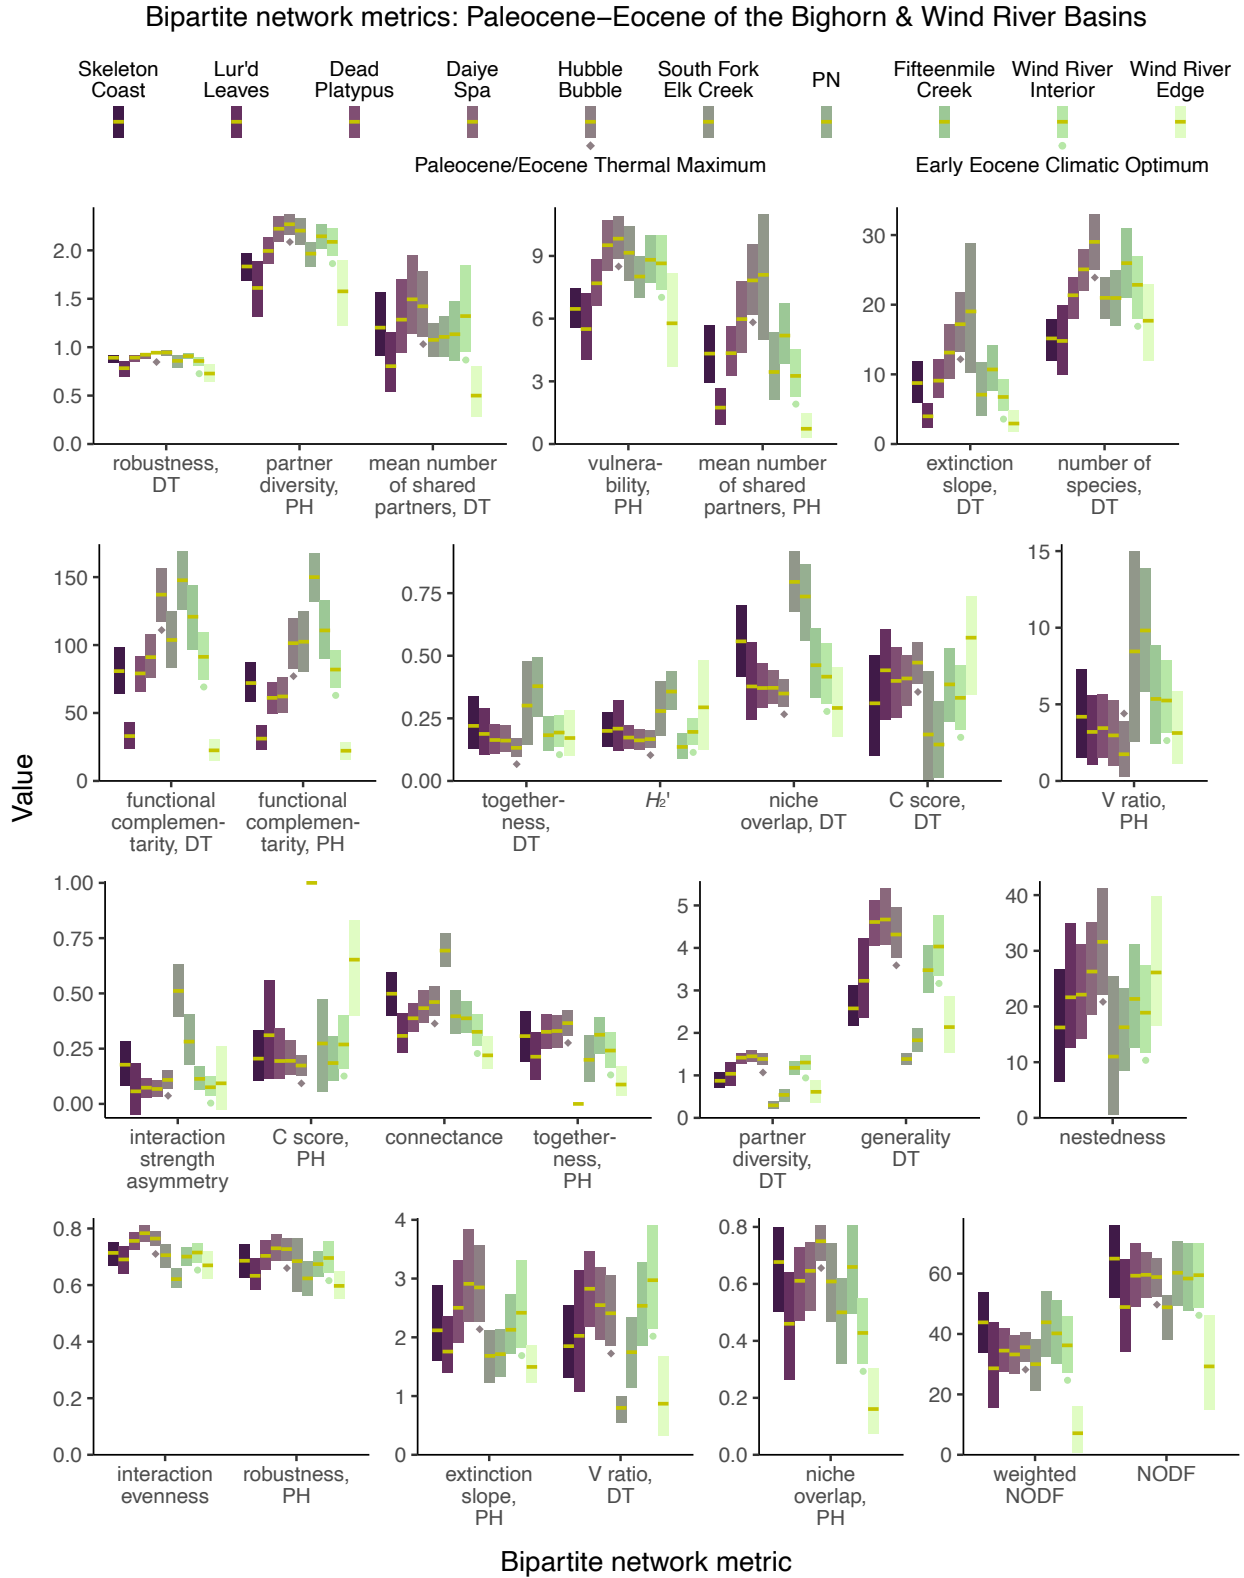

Figure 11: Mean values and 95% confidence intervals for bipartite network metrics, generated by subsampling each dataset to 300 leaves. Legend: PH = plant host, DT = damage type.

| Intervals being compared                                                                                                                         | Metrics that suggest little or no difference                                                                                                                                                                                                                                                                                   | Metrics that suggest a drastic difference                                                                                                                                                                          | Metrics with inconclusive results                                                                                                                            |
|--------------------------------------------------------------------------------------------------------------------------------------------------|--------------------------------------------------------------------------------------------------------------------------------------------------------------------------------------------------------------------------------------------------------------------------------------------------------------------------------|--------------------------------------------------------------------------------------------------------------------------------------------------------------------------------------------------------------------|--------------------------------------------------------------------------------------------------------------------------------------------------------------|
| PETM (Hubble Bubble, <a href="#">Currano et al., 2008</a> ) and EECO (Wind River Interior, <a href="#">Currano et al., 2019</a> )                | robustness DT, mean number of shared partners DT, interaction strength asymmetry, partner diversity DT, generality DT, robustness PH, extinction slope PH, V ratio DT, weighted NODF, NODF                                                                                                                                     | mean number of shared partners PH, extinction slope DT, number of species DT, functional complementarity DT, connectance, togetherness PH, interaction evenness, niche overlap PH                                  | partner diversity PH, vulnerability PH, functional complementarity PH, togetherness DT, H2, niche overlap DT, C score DT, V ratio PH, C score PH, nestedness |
| Latest Paleocene (Daiye Spa, <a href="#">Currano et al., 2008</a> ) and PETM (Hubble Bubble, <a href="#">Currano et al., 2008</a> )              | partner diversity PH, mean number of shared partners DT, vulnerability PH, togetherness DT, H2, niche overlap DT, C score DT, V ratio PH, C score PH, connectance, togetherness PH, partner diversity DT, generality DT, nestedness, interaction evenness, robustness PH, extinction slope PH, V ratio DT, weighted NODF, NODF | functional complementarity DT, functional complementarity PH                                                                                                                                                       | robustness DT, mean number of shared partners PH, extinction slope DT, number of species DT, interaction strength asymmetry, niche overlap PH                |
| PETM (Hubble Bubble, <a href="#">Currano et al., 2008</a> ) and earliest Eocene (South Fork of Elk Creek, <a href="#">Currano et al., 2008</a> ) | robustness DT, partner diversity PH, vulnerability PH, mean number of shared partners PH, extinction slope DT, functional complementarity PH, robustness PH, weighted NODF                                                                                                                                                     | number of species DT, niche overlap DT, interaction strength asymmetry, C score PH, connectance, togetherness PH, partner diversity DT, generality DT, interaction evenness, extinction slope PH, V ratio DT, NODF | mean number of shared partners DT, functional complementarity DT, togetherness DT, H2, C score DT, V ratio PH, nestedness, niche overlap PH                  |

Table 2: The variety of narratives about the PETM supported by different combinations of bipartite network metrics.

516

## 4 CONCLUSIONS

517 The challenge of linking host plants to damage types through bipartite network analysis is twofold. First,  
518 sampling incompleteness does not simply cause increased uncertainty, as is the case for consistent and  
519 unbiased estimators such as the herbivory index or coverage-based rarefaction of damage type diversity;  
520 instead, sampling incompleteness typically leads to inaccurate, misleading results. And second, the wide  
521 variety of bipartite network metrics creates many opportunities for HARKing. Those opportunities are  
522 exacerbated by the unclear meanings of these metrics.

523 No amount of sampling completeness can remove the potential for HARKing presented by bipartite  
524 network analysis, but our results show that alternative methods that are unsusceptible to HARKing can be  
525 used to evaluate host specificity, to compare component communities, and to measure the diversity of  
526 interactions at an assemblage. Rarefied interaction richness and the components of beta diversity are much  
527 more likely than bipartite network metrics to perform as unbiased and consistent estimators, and do not  
528 require complete sampling of damage types across all host plants at an assemblage. Much essential

529 information is still lacking: the exact sample coverage required for valid measurement of abundance  
530 gradients, balanced variation, and the diversity of interactions; as well as the surface area data required for  
531 evaluation of host specificity, which are unavailable for most published assemblages. However, the first step  
532 is understanding which analyses are meaningful and which measurements are needed for those analyses to  
533 be valid.

534 At present, there are a number of large gaps in our knowledge of fossil herbivory. First is the nearly  
535 complete lack of Pennsylvanian or Jurassic assemblages examined for herbivory and the lack of early-to-mid  
536 Cretaceous assemblages. Second is the general lack of assemblages examined from tropical latitudes. Third  
537 is the widespread lack of surface area measurements, which are necessary for evaluating the intensity of  
538 herbivory (Schachat et al., 2018). Fourth is the widespread lack of counts of the number of times that each  
539 damage type appears on each leaf. These data can be used to evaluate various hypotheses about the causes  
540 of increased herbivory (Schachat et al., 2021). In light of the limited amount of time that paleontologists  
541 are able to spend collecting fossil herbivory data, we believe that addressing these four gaps is the most  
542 important use of investigator effort.

## 543 REFERENCES

- 544 Adroit, B., Girard, V., Kunzmann, L., Terral, J.-F., and Wappler, T. (2018). Plant–insect interactions  
545 patterns in three European paleoforests of the late-Neogene—early-Quaternary. *PeerJ*, 6:e5075.
- 546 Arceo-Gómez, G., Alonso, C., Ashman, T.-L., and Parra-Tabla, V. (2018). Variation in sampling effort  
547 affects the observed richness of plant–plant interactions via heterospecific pollen transfer: Implications for  
548 interpretation of pollen transfer networks. *American Journal of Botany*, 105(9):1601–1608.
- 549 Baselga, A. (2010). Partitioning the turnover and nestedness components of beta diversity. *Global Ecology*  
550 *and Biogeography*, 19(1):134–143.
- 551 Baselga, A. (2017). Partitioning abundance-based multiple-site dissimilarity into components: Balanced  
552 variation in abundance and abundance gradients. *Methods in Ecology and Evolution*, 8(7):799–808.
- 553 Baselga, A. and Orme, C. D. L. (2012). Betapart: An R package for the study of beta diversity. *Methods in*  
554 *Ecology and Evolution*, 3(5):808–812.
- 555 Basset, Y. (1992). Host specificity of arboreal and free-living insect herbivores in rain forests. *Biological*  
556 *Journal of the Linnean Society*, 47(2):115–133.
- 557 Basset, Y., Samuelson, G., and Miller, S. E. (1996). Similarities and contrasts in the local insect faunas  
558 associated with ten forest tree species of New Guinea. *Pacific Science*, 50(2):157–183.
- 559 Beck, A. L. and Labandeira, C. C. (1998). Early Permian insect folivory on a gigantopterid-dominated  
560 riparian flora from north-central Texas. *Palaeogeography, Palaeoclimatology, Palaeoecology*, 142:139–173.
- 561 Bennett, J. M., Thompson, A., Goia, I., Feldmann, R., Ștefan, V., Bogdan, A., Rakosy, D., Beloiu, M., Biro,  
562 I.-B., Bluemel, S., Filip, M., Madaj, A.-M., Martin, A., Passonneau, S., Kalisch, D. P., Scherer, G., and  
563 Knight, T. M. (2018). A review of European studies on pollination networks and pollen limitation, and a  
564 case study designed to fill in a gap. *AoB PLANTS*, 10(6):ply068.
- 565 Bissonette, J. A. (2021). Big data, exploratory data analyses and questionable research practices: Suggestion  
566 for a foundational principle. *Wildlife Society Bulletin*, 45(3):366–370.
- 567 Blasco-Moreno, A., Pérez-Casany, M., Puig, P., Morante, M., and Castells, E. (2019). What does a zero  
568 mean? Understanding false, random and structural zeros in ecology. *Methods in Ecology and Evolution*,  
569 10(7):949–959.
- 570 Blüthgen, N. (2010). Why network analysis is often disconnected from community ecology: A critique and  
571 an ecologist’s guide. *Basic and Applied Ecology*, 11(3):185–195.

- 572 Blüthgen, N., Fründ, J., Vázquez, D. P., and Menzel, F. (2008). What do interaction network metrics tell  
573 us about specialization and biological traits. *Ecology*, 89(12):3387–3399.
- 574 Blüthgen, N., Menzel, F., and Blüthgen, N. (2006). Measuring specialization in species interaction networks.  
575 *BMC Ecology*, 6(1):9.
- 576 Burkle, L. and Irwin, R. (2009). The importance of interannual variation and bottom–up nitrogen enrichment  
577 for plant–pollinator networks. *Oikos*, 118(12):1816–1829.
- 578 Carvalho, M. R., Wilf, P., Barrios, H., Windsor, D. M., Currano, E. D., Labandeira, C. C., and Jaramillo,  
579 C. A. (2014). Insect leaf-chewing damage tracks herbivore richness in modern and ancient forests. *PLOS*  
580 *ONE*, 9(5):e94950.
- 581 Chao, A. and Jost, L. (2012). Coverage-based rarefaction and extrapolation: Standardizing samples by  
582 completeness rather than size. *Ecology*, 93(12):2533–2547.
- 583 Correia, P., Bashforth, A. R., Šimůnek, Z., Cleal, C. J., Sá, A. A., and Labandeira, C. C. (2020). The history  
584 of herbivory on sphenophytes: A new calamitalean with an insect gall from the Upper Pennsylvanian of  
585 Portugal and a review of arthropod herbivory on an ancient lineage. *International Journal of Plant*  
586 *Sciences*, 181(4):387–418.
- 587 Costa, J. M., da Silva, L. P., Ramos, J. A., and Heleno, R. H. (2016). Sampling completeness in seed  
588 dispersal networks: When enough is enough. *Basic and Applied Ecology*, 17(2):155–164.
- 589 Currano, E. D. (2009). Patchiness and long-term change in early Eocene insect feeding damage. *Paleobiology*,  
590 35(4):484–498.
- 591 Currano, E. D., Azevedo-Schmidt, L. E., Maccracken, S. A., and Swain, A. (2021). Scars on fossil leaves: An  
592 exploration of ecological patterns in plant–insect herbivore associations during the Age of Angiosperms.  
593 *Palaeogeography, Palaeoclimatology, Palaeoecology*, 582:110636.
- 594 Currano, E. D., Labandeira, C. C., and Wilf, P. (2010). Fossil insect folivory tracks paleotemperature for  
595 six million years. *Ecological Monographs*, 80(4):547–567.
- 596 Currano, E. D., Laker, R., Flynn, A. G., Fogt, K. K., Stradtman, H., and Wing, S. L. (2016). Consequences  
597 of elevated temperature and  $p\text{CO}_2$  on insect folivory at the ecosystem level: Perspectives from the fossil  
598 record. *Ecology and Evolution*, 6(13):4318–4331.
- 599 Currano, E. D., Pinheiro, E. R. S., Buchwaldt, R., Clyde, W. C., and Miller, I. M. (2019). Endemism  
600 in Wyoming plant and insect herbivore communities during the early Eocene hothouse. *Paleobiology*,  
601 45(3):421–439.
- 602 Currano, E. D., Wilf, P., Wing, S. L., Labandeira, C. C., Lovelock, E. C., and Royer, D. L. (2008). Sharply  
603 increased insect herbivory during the Paleocene–Eocene Thermal Maximum. *Proceedings of the National*  
604 *Academy of Sciences of the United States of America*, 105(6):1960–1964.
- 605 Deng, W., Su, T., Wappler, T., Liu, J., Li, S., Huang, J., Tang, H., Low, S. L., Wang, T., Xu, H., Xu, X.,  
606 Liu, P., and Zhou, Z. (2020). Sharp changes in plant diversity and plant-herbivore interactions during the  
607 Eocene–Oligocene transition on the southeastern Qinghai-Tibetan Plateau. *Global and Planetary Change*,  
608 194:103293.
- 609 Ding, Q., Labandeira, C. C., Meng, Q., and Ren, D. (2015). Insect herbivory, plant-host specialization  
610 and tissue partitioning on mid-Mesozoic broadleaved conifers of Northeastern China. *Palaeogeography,*  
611 *Palaeoclimatology, Palaeoecology*, 440:259–273.
- 612 Ding, Q., Labandeira, C. C., and Ren, D. (2014). Biology of a leaf miner (Coleoptera) on *Liaoningocladus*  
613 *boii* (Coniferales) from the Early Cretaceous of northeastern China and the leaf-mining biology of possible  
614 insect culprit clades. *Arthropod Systematics & Phylogeny*, 72(3):281–308.

- 615 Diserud, O. H. and Engen, S. (2000). A general and dynamic species abundance model, embracing the  
616 lognormal and the gamma models. *The American Naturalist*, 155(4):497–511.
- 617 Donovan, M. P., Wilf, P., Labandeira, C. C., Johnson, K. R., and Peppe, D. J. (2014). Novel insect leaf-  
618 mining after the end-Cretaceous extinction and the demise of Cretaceous leaf miners, Great Plains, USA.  
619 *PLoS ONE*, 9(7):e103542.
- 620 Dorado, J., Vázquez, D. P., Stevani, E. L., and Chacoff, N. P. (2011). Rareness and specialization in  
621 plant–pollinator networks. *Ecology*, 92(1):19–25.
- 622 Doré, M., Fontaine, C., and Thébault, E. (2021). Relative effects of anthropogenic pressures, climate, and  
623 sampling design on the structure of pollination networks at the global scale. *Global Change Biology*,  
624 27(6):1266–1280.
- 625 Dormann, C. F., Fründ, J., Blüthgen, N., and Gruber, B. (2009). Indices, graphs and null models: Analyzing  
626 bipartite ecological networks. *The Open Ecology Journal*, 2(1):7–24.
- 627 Dormann, C. F., Gruber, B., and Fründ, J. (2008). Introducing the bipartite package: Analysing ecological  
628 networks. *interaction*, 1(0.2413793).
- 629 D’Rozario, A., Labandeira, C., Guo, W. Y., Yao, Y. F., and Li, C. S. (2011). Spatiotemporal extension of  
630 the Euramerican *Psaronius* component community to the Late Permian of Cathaysia: In situ coprolites  
631 in a *P. housuoensis* stem from Yunnan Province, southwest China. *Palaeogeography, Palaeoclimatology,*  
632 *Palaeoecology*, 306(3-4):127–133.
- 633 Dyer, L. A., Walla, T. R., Greeney, H. F., Stireman III, J. O., and Hazen, R. F. (2010). Diversity of  
634 interactions: A metric for studies of biodiversity. *Biotropica*, 42(3):281–289.
- 635 Feng, Z., Wang, J., Rößler, R., Ślipiński, A., and Labandeira, C. (2017). Late Permian wood-borings reveal  
636 an intricate network of ecological relationships. *Nature Communications*, 8(1):556.
- 637 Forister, M. L., Novotny, V., Panorska, A. K., Baje, L., Basset, Y., Butterill, P. T., Cizek, L., Coley, P. D.,  
638 Dem, F., Diniz, I. R., Drozd, P., Fox, M., Glassmire, A. E., Hazen, R., Hrcek, J., Jahner, J. P., Kaman,  
639 O., Kozubowski, T. J., a Kursar, T., Lewis, O. T., Lill, J., Marquis, R. J., Miller, S. E., Morais, H. C.,  
640 Murakami, M., Nickel, H., a Pardikes, N., Ricklefs, R. E., Singer, M. S., Smilanich, A. M., Stireman,  
641 J. O., Villamarín-Cortez, S., Vodka, S., Volf, M., Wagner, D. L., Walla, T., Weiblen, G. D., and a Dyer, L.  
642 (2015). The global distribution of diet breadth in insect herbivores. *Proceedings of the National Academy*  
643 *of Sciences of the United States of America*, 112(2):442–7.
- 644 Fraser, H., Parker, T., Nakagawa, S., Barnett, A., and Fidler, F. (2018). Questionable research practices in  
645 ecology and evolution. *PLOS ONE*, 13(7):e0200303.
- 646 Fründ, J., McCann, K. S., and Williams, N. M. (2016). Sampling bias is a challenge for quantifying  
647 specialization and network structure: Lessons from a quantitative niche model. *Oikos*, 125(4):502–513.
- 648 Gibson, R. H., Knott, B., Eberlein, T., and Memmott, J. (2011). Sampling method influences the structure  
649 of plant–pollinator networks. *Oikos*, 120(6):822–831.
- 650 Goldwasser, L. and Roughgarden, J. (1997). Sampling effects and the estimation of food-web properties.  
651 *Ecology*, 78(1):41–54.
- 652 Good, I. J. (1953). The population frequencies of species and the estimation of population parameters.  
653 *Biometrika*, 40(3-4):237–264.
- 654 Grass, I., Berens, D. G., Peter, F., and Farwig, N. (2013). Additive effects of exotic plant abundance and  
655 land-use intensity on plant–pollinator interactions. *Oecologia*, 173(3):913–923.
- 656 Greenwood, D. R. (1991). The taphonomy of plant macrofossils. In Donovan, S., editor, *The Processes of*  
657 *Fossilization*, pages 141–169. Belhaven Press, London.



- 658 Henriksen, M. V., Chapple, D. G., Chown, S. L., and McGeoch, M. A. (2019). The effect of network size  
659 and sampling completeness in depauperate networks. *Journal of Animal Ecology*, 88(2):211–222.
- 660 Hsieh, T. C., Ma, K. H., and Chao, A. (2016). iNEXT: An R package for rarefaction and extrapolation of  
661 species diversity (Hill numbers). *Methods in Ecology and Evolution*, 7(12):1451–1456.
- 662 Hutson, M. (2018). Artificial intelligence faces reproducibility crisis. *Science*, 359(6377):725–726.
- 663 Jordano, P. (2016). Sampling networks of ecological interactions. *Functional Ecology*, 30(12):1883–1893.
- 664 Kemp, J. E. and Ellis, A. G. (2017). Significant local-scale plant-insect species richness relationship  
665 independent of abiotic effects in the temperate Cape Floristic Region biodiversity hotspot. *PLOS ONE*,  
666 12(1):e0168033.
- 667 Knor, S., Prokop, J., Kvaček, Z., Janovský, Z., and Wappler, T. (2012). Plant–arthropod associations  
668 from the Early Miocene of the Most Basin in North Bohemia—Palaeoecological and palaeoclimatological  
669 implications. *Palaeogeography, Palaeoclimatology, Palaeoecology*, 321–322:102–112.
- 670 Kuppler, J., Grassegger, T., Peters, B., Popp, S., Schlager, M., and Junker, R. R. (2017). Volatility of  
671 network indices due to undersampling of intraspecific variation in plant–insect interactions. *Arthropod-  
672 Plant Interactions*, 11(4):561–566.
- 673 Kustatscher, E., van Konijnenburg-van Cittert, J. H., Looy, C. V., Labandeira, C. C., Wappler, T.,  
674 Butzmann, R., Fischer, T., Krings, M., Kerp, H., and Visscher, H. (2018). The Lopingian (late Permian)  
675 flora from the Bletterbach Gorge in the Dolomites, Northern Italy: A review. *Geo. Alp*, 14:39–61.
- 676 Labandeira, C. C. (1998). Plant-insect associations from the fossil record. *Geotimes*, 43(9):18–24.
- 677 Labandeira, C. C. (2002). Paleobiology of middle Eocene plant-insect associations from the Pacific Northwest:  
678 A preliminary report. *Rocky Mountain Geology*, 37(1):31–59.
- 679 Labandeira, C. C., Anderson, J. M., and Anderson, H. M. (2018). Expansion of arthropod herbivory in Late  
680 Triassic South Africa: The Molteno Biota, Aasvoëlberg 411 site and developmental biology of a gall. In  
681 Tanner, L. H., editor, *The Late Triassic World: Earth in a Time of Transition*, pages 623–719. Springer  
682 International Publishing, Cham.
- 683 Labandeira, C. C. and Currano, E. D. (2013). The fossil record of plant–insect dynamics. *Annual Review of  
684 Earth and Planetary Sciences*, 41(1):287–311.
- 685 Labandeira, C. C., Kustatscher, E., and Wappler, T. (2016). Floral assemblages and patterns of insect  
686 herbivory during the Permian to Triassic of northeastern Italy. *PLoS ONE*, 11:e0165205.
- 687 Labandeira, C. C., Tremblay, S. L., Bartowski, K. E., and VanAller Hernick, L. (2013). Middle Devonian  
688 liverwort herbivory and antiherbivore defence. *New Phytologist*, 200:247–258.
- 689 Labandeira, C. C., Wilf, P., Johnson, K. R., and Marsh, F. (2007). *Guide to Insect (and Other) Damage  
690 Types on Compressed Plant Fossils (Version 3.0)*. Smithsonian Institution, Washington DC.
- 691 Lewis, O. T., Memmott, J., Lasalle, J., Lyal, C. H. C., Whitefoord, C., and Godfray, H. C. J. (2002).  
692 Structure of a diverse tropical forest insect–parasitoid community. *Journal of Animal Ecology*, 71(5):855–  
693 873.
- 694 Liu, H.-Y., Wei, H.-B., Chen, J., Guo, Y., Zhou, Y., Gou, X.-D., Yang, S.-L., Labandeira, C., and Feng, Z.  
695 (2020). A latitudinal gradient of plant–insect interactions during the late Permian in terrestrial ecosystems?  
696 new evidence from Southwest China. *Global and Planetary Change*, 192:103248.
- 697 Lundgren, R. and Olesen, J. M. (2005). The dense and highly connected world of Greenland’s plants and  
698 their pollinators. *Arctic, Antarctic, and Alpine Research*, 37(4):514–520.

- 699 Maccracken, S. A. and Labandeira, C. C. (2020). The Middle Permian South Ash Pasture assemblage  
700 of north-central Texas: Coniferophyte and gigantopterid herbivory and longer-term herbivory trends.  
701 *International Journal of Plant Sciences*, 181(3):342–362.
- 702 Maia, L. F., Nascimento, A. R., and Faria, L. D. B. (2018). Four years host–parasitoid food web: Testing  
703 sampling effort on trophic levels. *Studies on Neotropical Fauna and Environment*, 53(2):132–142.
- 704 Marcon, E. and Hérault, B. (2015). Entropart: An R package to measure and partition diversity. *Journal*  
705 *of Statistical Software*, 67(1):1–26.
- 706 Martínez-Delclòs, X. and Martinell, J. (1993). Insect taphonomy experiments. Their application to the  
707 Cretaceous outcrops of lithographic limestones from Spain. *Kaupia*, 2:133–144.
- 708 Mokam, D. G., Djiéto-Lordon, C., and Bilong Bilong, C.-F. (2014). Patterns of species richness and diversity  
709 of insects associated With cucurbit fruits in the southern part of Cameroon. *Journal of Insect Science*,  
710 14(1).
- 711 Morris, R. J., Gripenberg, S., Lewis, O. T., and Roslin, T. (2014). Antagonistic interaction networks are  
712 structured independently of latitude and host guild. *Ecology Letters*, 17(3):340–349.
- 713 Nelson, N. C., Ichikawa, K., Chung, J., and Malik, M. M. (2021). Mapping the discursive dimensions of the  
714 reproducibility crisis: A mixed methods analysis. *PLOS ONE*, 16(7):e0254090.
- 715 Neuwirth, E. and Brewer, R. C. (2014). ColorBrewer palettes.
- 716 Novotny, V., Basset, Y., Miller, S. E., Drozd, P., and Cizek, L. (2002). Host specialization of leaf-chewing  
717 insects in a New Guinea rainforest. *Journal of Animal Ecology*, 71(3):400–412.
- 718 Novotny, V., Miller, S. E., Hrcek, J., Baje, L., Basset, Y., Lewis, O. T., Stewart, A. J. A., and Weiblen,  
719 G. D. (2012). Insects on plants: Explaining the paradox of low diversity within specialist herbivore guilds.  
720 *The American Naturalist*, 179(3):351–362.
- 721 Novotny, V., Miller, S. E., Leps, J., Basset, Y., Bito, D., Janda, M., Hulcr, J., Damas, K., and Weiblen,  
722 G. D. (2004). No tree an island: The plant–caterpillar food web of a secondary rain forest in New Guinea.  
723 *Ecology Letters*, 7(11):1090–1100.
- 724 O’Boyle, E. H., Banks, G. C., and Gonzalez-Mulé, E. (2017). The Chrysalis Effect: How ugly initial results  
725 metamorphosize into beautiful articles. *Journal of Management*, 43(2):376–399.
- 726 O’Dea, R. E., Parker, T. H., Chee, Y. E., Culina, A., Drobniak, S. M., Duncan, D. H., Fidler, F., Gould, E.,  
727 Ihle, M., Kelly, C. D., Lagisz, M., Roche, D. G., Sánchez-Tójar, A., Wilkinson, D. P., Wintle, B. C., and  
728 Nakagawa, S. (2021). Towards open, reliable, and transparent ecology and evolutionary biology. *BMC*  
729 *Biology*, 19(1):68.
- 730 Oleques, S. S., Vizentin-Bugoni, J., and Overbeck, G. E. (2019). Influence of grazing intensity on patterns and  
731 structuring processes in plant–pollinator networks in a subtropical grassland. *Arthropod-Plant Interactions*,  
732 13(5):757–770.
- 733 Olesen, J. M., Bascompte, J., Elberling, H., and Jordano, P. (2008). Temporal dynamics in a pollination  
734 network. *Ecology*, 89(6):1573–1582.
- 735 Parker, T., Fraser, H., and Nakagawa, S. (2019). Making conservation science more reliable with  
736 preregistration and registered reports. *Conservation Biology*, 33(4):747–750.
- 737 Pedersen, T. L. and Cramer, F. (2020). Package ‘sico’.
- 738 Peguero, G., Bonal, R., Sol, D., Muñoz, A., Sork, V. L., and Espelta, J. M. (2017). Tropical insect diversity:  
739 Evidence of greater host specialization in seed-feeding weevils. *Ecology*, 98(8):2180–2190.
- 740 Pinheiro, M., de Abrão, B. E., Harter-Marques, B., and Miotto, S. T. S. (2008). Floral resources used by  
741 insects in a grassland community in Southern Brazil. *Brazilian Journal of Botany*, 31:469–489.

- 742 Potonié, H. (1893). Die Flora des Rotliegenden von Thuringen. *Königliche Preussische Geologie*, 9:1–298.
- 743 Prevec, R., Labandeira, C. C., Neveling, J., Gastaldo, R. A., Looy, C. V., and Bamford, M. (2009). Portrait  
744 of a Gondwanan ecosystem: A new late Permian fossil locality from KwaZulu-Natal, South Africa. *Review*  
745 *of Palaeobotany and Palynology*, 156(3-4):454–493.
- 746 R Development Core Team (2021). R: A language and environment for statistical computing.
- 747 Reice, S. R. (1974). Environmental patchiness and the breakdown of leaf litter in a woodland stream. *Ecology*,  
748 55(6):1271–1282.
- 749 Root, R. B. (1973). Organization of a plant–arthropod association in simple and diverse habitats: The fauna  
750 of collards (*Brassica oleracea*). *Ecological Monographs*, 43(1):95–124.
- 751 Schachat, S. R., Labandeira, C. C., and Chaney, D. S. (2015). Insect herbivory from early Permian Mitchell  
752 Creek Flats of north-central Texas: Opportunism in a balanced component community. *Palaeogeography*,  
753 *Palaeoclimatology, Palaeoecology*, 440:830–847.
- 754 Schachat, S. R., Labandeira, C. C., Gordon, J., Chaney, D., Levi, S., Halthore, M. N., and Alvarez, J.  
755 (2014). Plant–insect interactions from Early Permian (Kungurian) Colwell Creek Pond, north-central  
756 Texas: The early spread of herbivory in riparian environments. *International Journal of Plant Sciences*,  
757 175(8):855–890.
- 758 Schachat, S. R., Labandeira, C. C., and Maccracken, S. A. (2018). The importance of sampling  
759 standardization for comparisons of insect herbivory in deep time: A case study from the late Palaeozoic.  
760 *Royal Society Open Science*, 5(3):171991.
- 761 Schachat, S. R., Payne, J. L., Boyce, C. K., and Labandeira, C. C. (2021). Generating and testing hypotheses  
762 about the fossil record of insect herbivory with a theoretical ecospace. *bioRxiv*.
- 763 Slater, B. J., McLoughlin, S., and Hilton, J. (2012). Animal–plant interactions in a Middle  
764 Permian permineralised peat of the Bainmedart Coal Measures, Prince Charles Mountains, Antarctica.  
765 *Palaeogeography, Palaeoclimatology, Palaeoecology*, 363–364:109–126.
- 766 Slater, B. J., McLoughlin, S., and Hilton, J. (2015). A high-latitude Gondwanan lagerstätte: The Permian  
767 permineralised peat biota of the Prince Charles Mountains, Antarctica. *Gondwana Research*, 27(4):1446–  
768 1473.
- 769 Smith, D. M. and Moe-Hoffman, A. P. (2007). Taphonomy of Diptera in lacustrine environments: A case  
770 study from Florissant Fossil Beds, Colorado. *Palaios*, 22(6):623–629.
- 771 Smith, J. A., Handley, J. C., and Dietl, G. P. (2021). Accounting for uncertainty from zero inflation  
772 and overdispersion in paleoecological studies of predation using a hierarchical Bayesian framework.  
773 *Paleobiology*, pages 1–18.
- 774 Smith-Ramírez, C., Martínez, P., Nuñez, M., González, C., and Armesto, J. J. (2005). Diversity, flower  
775 visitation frequency and generalism of pollinators in temperate rain forests of Chiloé Island, Chile.  
776 *Botanical Journal of the Linnean Society*, 147(4):399–416.
- 777 Su, T., Adams, J. M., Wappler, T., Huang, Y.-J., Jacques, F. M. B., Liu, Y.-s., and Zhou, Z.-k. (2015).  
778 Resilience of plant–insect interactions in an oak lineage through Quaternary climate change. *Paleobiology*,  
779 41(1):174–186.
- 780 Swain, A., Azevedo Schmidt, L. E., Maccracken, S. A., Currano, E. D., Dunne, J. A., Labandeira, C. C., and  
781 Fagan, W. F. (2021a). Effects of sampling bias on robustness of ecological metrics in fossil plant–damage  
782 type association networks. *Geological Society of America Abstracts with Programs*, 53(6).
- 783 Swain, A., Maccracken, S. A., Fagan, W. F., and Labandeira, C. C. (2021b). Understanding the ecology  
784 of host plant–insect herbivore interactions in the fossil record through bipartite networks. *Paleobiology*,  
785 pages 1–22.

- 786 Trøjelsgaard, K., Jordano, P., Carstensen, D. W., and Olesen, J. M. (2015). Geographical variation in  
787 mutualistic networks: Similarity, turnover and partner fidelity. *Proceedings of the Royal Society B:*  
788 *Biological Sciences*, 282(1802):20142925.
- 789 Vázquez, D. P. and Aizen, M. A. (2003). Null model analyses of specialization in plant–pollinator interactions.  
790 *Ecology*, 84(9):2493–2501.
- 791 Wappler, T. (2010). Insect herbivory close to the Oligocene–Miocene transition—A quantitative analysis.  
792 *Palaeogeography, Palaeoclimatology, Palaeoecology*, 292(3-4):540–550.
- 793 Wappler, T., Labandeira, C. C., Rust, J., Frankenhäuser, H., and Wilde, V. (2012). Testing for the effects  
794 and consequences of mid Paleogene climate change on insect herbivory. *PLoS ONE*, 7(7).
- 795 Webber, Q. M., Schneider, D. C., and Vander Wal, E. (2020). Is less more? a commentary on the practice  
796 of ‘metric hacking’ in animal social network analysis. *Animal Behaviour*, 168:109–120.
- 797 Whittaker, R. H. and Levin, S. A. (1977). The role of mosaic phenomena in natural communities. *Theoretical*  
798 *Population Biology*, 12(2):117–139.
- 799 Wilf, P. and Labandeira, C. C. (1999). Response of plant–insect associations to Paleocene–Eocene warming.  
800 *Science*, 284(5423):2153–2156.
- 801 Wilf, P., Labandeira, C. C., Johnson, K. R., and Cuneo, N. R. (2005). Richness of plant–insect associations  
802 in Eocene Patagonia: A legacy for South American biodiversity. *Proceedings of National Academy of*  
803 *Sciences of the United States of America*, 102(25):8944–8948.
- 804 Wilf, P., Labandeira, C. C., Johnson, K. R., and Ellis, B. (2006). Decoupled plant and insect diversity after  
805 the end-Cretaceous extinction. *Science*, 313(5790):1112–1115.
- 806 Xu, Q., Jin, J., and Labandeira, C. C. (2018). Williamson Drive: Herbivory on a north-central Texas flora  
807 of latest Pennsylvanian age shows discrete component community structure, expansion of piercing and  
808 sucking, and plant counterdefenses. *Review of Palaeobotany and Palynology*, 251:28–72.
- 809 Zemenick, A. T., Vanette, R. L., and Rosenheim, J. A. (2021). Linked networks reveal dual roles of insect  
810 dispersal and species sorting for bacterial communities in flowers. *Oikos*, 130(5):697–707.

811

## 5 APPENDIX

812

### 5.1 CALCULATING $p$ -VALUES FOR HOST SPECIFICITY

813

The absolute amount of surface area examined should be taken into account when determining host specificity because if the total amount of surface area is very small, the apparent restriction of a damage type to a particular clade of host plants will very possibly be an artifact of insufficient sampling. The relative amount of surface area should be taken into account because this determines the probability that a damage type would falsely appear to be restricted to a particular clade of host plants.

814

Consider a hypothetical assemblage in which 100,000 cm<sup>2</sup> of surface area have been examined. If DT001 is restricted to a clade of host plants represented by a mere 500 cm<sup>2</sup> of surface area, and if DT001 is found on all 15 specimens belonging to the clade at this assemblage, then DT001 indeed appears to be specialized. This finding is supported by the large amount of surface area examined, by the moderately high number of specimens on which DT001 has been found, and by the small amount of relative surface area belonging to the plant clade in question, which confers a low probability that all detected incidents of DT001 would be restricted to this clade due to chance alone.

815

However, at Colwell Creek Pond, the host plant *Auritifolia wagoneri* accounts for over 60% of the broadleaf surface area examined. Therefore, especially if the total amount of surface area examined is low, a generalized damage type may appear to be restricted to *A. wagoneri* due to chance alone—particularly if the damage type is observed on only a few specimens. To test the frequency with which this sort of false

816

817

818

819

820

821

822

823

824

829 positive finding of specialized herbivory may occur, we resampled the data from Colwell Creek Pond for  
830 the four host plant taxa from this assemblage that unambiguously meet the criteria for inclusion outlined  
831 by Swain et al. (2021b): *A. waggoneri* (63% of total broadleaf surface area), *Taeniopteris* spp. (28%),  
832 *Evolsonia texana* (9%), and *Supaia thinnfeldioides* (1%). Our analysis focuses on two damage types, DT032  
833 and DT120. Both of these damage types occur on all four of these host plants, with distributions that  
834 approximate the amount of surface area examined for each host plant: the majority of incidences of each  
835 damage type are on *A. waggoneri* (63–89%), followed by *Taeniopteris* spp. (10–25%), *E. texana* (1–10%),  
836 and, lastly, *S. thinnfeldioides* (1–3%).

837 When a damage type is observed only on one clade of host plants at an assemblage, the surface area of  
838 those host plants can be used to test the null hypothesis that the damage type is restricted to a certain plant  
839 clade simply by chance. The proportion of all surface area examined at the assemblage that belongs to the  
840 clade in question—whether it is a genus or species, implying specialized host specificity, or a higher clade  
841 implying intermediate specificity—can be raised to the number of specimens on which the damage type was  
842 observed. This process generates a  $p$ -value that can be used to test the null hypothesis of generalized host  
843 specificity. Consider an example in which a damage type appears to have an intermediate host specificity  
844 because it occurs only on plants belonging to the same order. If this order accounts for 40% of all surface area  
845 examined at the assemblage, and if the damage type has been observed on five specimens, the  $p$ -value for  
846 its host specificity is  $0.4^5 = 0.01024$ . This value is below 0.05, and thus, the damage type has been observed  
847 on enough specimens to reject the null hypothesis of generalized host specificity. However, a correction for  
848 multiple comparisons, such as the Bonferroni correction or the Benjamini–Hochberg correction, should be  
849 used if this procedure is carried out for more than one damage type.

850 These findings presented in our Results section suggest that the more conservative Bonferroni correction  
851 should be used instead of the Benjamini–Hochberg correction when host specificity  $p$ -values are calculated  
852 for multiple damage types. Surface area data from additional assemblages, with as much area as Colwell  
853 Creek Pond or more, are needed in order to determine whether the Benjamini–Hochberg correction will  
854 suffice.

855 Another fundamental, unresolved issue pertaining to the assignment of host-specificity scores is the  
856 definition of “specialized” and “intermediate” host specialization. If a damage type occurs on multiple genera  
857 within the same family, is it a specialized damage type, because it is restricted to one family, or is it an  
858 intermediate damage type, because it occurs on multiple genera? To our knowledge, this question has never  
859 been answered, leaving each team of authors to draw the boundaries between specialized, intermediate, and  
860 generalized host specificity wherever they please. To our knowledge, the locations of these boundaries are not  
861 typically articulated in publications, leading to a lack of reproducibility. Because the majority of herbivorous  
862 insects feed on plants belonging to a single family (Forister et al., 2015), we recommend that a damage type  
863 which occurs on a single family be considered “specialized” and that a damage type which occurs on multiple  
864 families within a single order be considered “intermediate.”

865 We do not advocate assigning host-specificity scores to damage types. For reasons outlined in the  
866 Introduction, specialist herbivores can be largely or entirely responsible for a “generalized” damage type.  
867 For reasons outlined in the Results and Discussion, a “generalized” damage type can appear to be  
868 “specialized” due to sampling incompleteness. However, should any research teams continue to assign  
869 host-specificity scores, our method for generating  $p$ -values protects against false positive findings of  
870 specialized herbivory and our recommended boundaries between specialized, intermediate, and generalized  
871 host specificity provide an objective, reproducible, working definition.

## 872 5.2 CONSIDERATIONS FOR COVERAGE-BASED RAREFACTION OF INTERACTIONS

873 The input used for bipartite network analysis and for rarefaction of interactions is essentially the same  
874 (Table 3). Bipartite network analysis uses a matrix in which each row represents a host plant, each column  
875 represents an herbivore (or, for fossil herbivory, a damage type), and each cell represents the number of  
876 times that a given interaction was observed. In the example shown in Table 3, DT001 was observed on one  
877 specimen belonging to plant sp. 1 and DT002 was observed on five specimens belonging to plant sp. 1. For  
878 rarefaction of interactions, the matrix is vectorized, or transformed into a single row. The information about  
879 particular host plants and damage types is removed, only the numbers of observations remain, the ordering  
880 of these observations does not matter, and it does not matter whether unobserved interactions with a value



881 of 0 are retained in the vector.

|             | DT001 | DT002 | DT003 | DT004 |
|-------------|-------|-------|-------|-------|
| Plant sp. 1 | 1     | 5     | 0     | 2     |
| Plant sp. 2 | 2     | 0     | 0     | 6     |
| Plant sp. 3 | 0     | 0     | 1     | 0     |
| Plant sp. 4 | 0     | 1     | 0     | 1     |
| Plant sp. 5 | 0     | 3     | 0     | 1     |

Table 3: A toy example of the input used for bipartite network analysis. For rarefaction of interactions (Dyer et al., 2010), the input would be a vectorized version of this matrix, which could take any of the following forms: [ 1 5 0 2 2 0 0 6 0 0 1 0 0 1 0 1 0 3 0 1 ], or [ 1 5 2 2 6 1 1 1 3 1 ], or [ 6 5 3 2 2 1 1 1 1 1 0 0 0 0 0 0 0 0 0 ], or [ 6 5 3 2 2 1 1 1 1 1 ].

882 This vector is then used for a subsampling procedure, and can be subsampled to a threshold of sample  
 883 coverage as Schachat et al. (2021) have advocated. Whereas bipartite network analysis produces misleading  
 884 results with incomplete sampling by treating rare, undetected interactions as true absences, rarefaction of  
 885 interactions subsamples the observed interactions such that the rare, undetected interactions are removed  
 886 from the dataset and thus cannot bias the results. Once the dataset for an assemblage reaches the coverage  
 887 threshold to which all assemblages are subsampled, additional sampling completeness—revisiting an  
 888 assemblage that already reaches a sample coverage of 0.9, and collecting additional data until sample  
 889 coverage reaches 0.95—will not change the results on average, in contrast to bipartite network analysis.  
 890 This is because the progression of an unbiased sampling routine will lead to additional observations of  
 891 common interactions while allowing the observation of new, rare interactions.

892 In a typical rarefaction analysis in the context of fossil herbivory, the input is a vector that contains the  
 893 number of specimens upon which each damage type has been observed. For example, if DT001 and DT002  
 894 have each been observed on three specimens and DT003 has been observed on one specimen, the input vector  
 895 would take the form of [ 3 3 1 ]. To rarefy the interactions rather than the damage type incidences in this  
 896 toy example, if DT001 was observed on three specimens belonging to the same plant host and DT002 was  
 897 observed on two different plant hosts, the input vector would take the form of [ 3 2 1 1 ]: the second 3 in the  
 898 original vector, corresponding to DT002, has been split into a 2, representing two incidences of this damage  
 899 type on one plant host, and a 1, representing an incidence of this same damage type on a different plant  
 900 host.

901 There is a computational issue with increasing the number of values in an input vector that equal 1: this  
 902 reduces sample coverage (Good, 1953). Because scaling rarefaction curves by the number of leaves examined  
 903 is an inadequate substitute for scaling by the amount of surface area examined (Schachat et al., 2018),  
 904 coverage-based rarefaction is the only appropriate method for comparing assemblages that lack measurements  
 905 of surface area. But the sampling completeness that is needed to rarefy damage type diversity (Schachat  
 906 et al., 2021) will far fall short of the sampling completeness needed to rarefy the diversity of interactions.  
 907 For example, when we iteratively subsampled the Willershausen dataset to 1,000 leaves, sample coverage  
 908 was as low as 0.599—a level at which comparisons will be grossly under-powered, as discussed by (Schachat  
 909 et al., 2021). Therefore, we evaluated rarefaction of interactions with a simulated dataset.

### 910 5.3 HOST PLANTS WITH SAMPLE COVERAGE ABOVE 0.99

911 The following is a non-exhaustive list of host plants censused for fossil herbivory, for which sample coverage is  
 912 above 0.99. *Zelkova ungeri* from Willershausen (Adroit et al., 2018); *Macginitiea gracilis* (Lesquereux) Wolfe  
 913 & Wehr from PN (Curran et al., 2010); *Heidiphyllum elongatum* (Morris) Retallack from Aasvoëlberg 311  
 914 (Labandeira et al., 2018); *Sphenobaiera schenckii* (Feistmantel) Florin from Birds River 111 (Labandeira  
 915 et al., 2018); *Platanus raynoldsii* Newberry from Mexican Hat (Wilf et al., 2006; Donovan et al., 2014);  
 916 *Macroneuropteris scheuchzeri* from Williamson Drive (Xu et al., 2018); *A. waggoneri* from Colwell Creek  
 917 Pond (Schachat et al., 2014); *Quercus* sp. L. from Longmen (Su et al., 2015).

918 When coverage equals 1, this is typically misleading, as it most likely signifies that either no damage has  
 919 been found on the host plant taxon in question (the Coverage function in the entropart package calculates

920 coverage of 1 when there is no damage) or that the sample size is much too small, which can spuriously  
921 lead to no singleton damage types. For example, Fabaceae sp. WW042 at the PN assemblage (Currano  
922 et al., 2010) is represented by 16 leaves. Three damage types are observed: DT002 is on two leaves, DT012  
923 is on six leaves, and DT032 is on two leaves. Coverage equals 1. However, if the number of leaves with  
924 DT002 is experimentally reduced from two to one, coverage falls from 1 to 0.9111. The only host plant  
925 we are aware of for which coverage of 1 is not a spurious artifact is *Quercus* sp. from Longmen (Su et al.,  
926 2015). Twelve damage types were found on the 1,027 leaves examined. All damage types were found on at  
927 least five leaves. If the number of leaf specimens with DT045 is experimentally reduced from five to four,  
928 coverage remains at 1. This suggests a rule of thumb for determining whether a high coverage estimate is  
929 an artifact: if coverage remains above 0.99 after one leaf specimen with the rarest non-singleton damage  
930 type is experimentally removed from the dataset, the coverage estimate is indeed robust. Notably, when  
931 we subsampled the Willershausen dataset to at least 1,000 leaves and iterated this procedure 10,000 times,  
932 coverage never exceeded 0.9972. It therefore appears that all coverage estimates that equal 1 would become  
933 slightly lower—if not far lower—with additional sampling. Thus, a coverage estimate of 0.995 is a stronger  
934 indicator of complete sampling than is a coverage estimate of 1.
